# Supplementary material for: Tropical tree height and crown allometries for the Barro Colorado Nature Monument, Panama: a comparison of alternative hierarchical models incorporating interspecific variation in relation to life history traits
Source: Copernicus journal article supplement (doi:10.5194/bg-16-847-2019), 2019-02-20
Supplement: Supplementary file 1 [file bg-16-847-2019-supplement.pdf]

Supplement of Biogeosciences, 16, 847–862, 2019  
<https://doi.org/10.5194/bg-16-847-2019-supplement>  
© Author(s) 2019. This work is distributed under  
the Creative Commons Attribution 4.0 License.

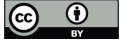

*Supplement of*

**Tropical tree height and crown allometries for the Barro Colorado Nature Monument, Panama: a comparison of alternative hierarchical models incorporating interspecific variation in relation to life history traits**

**Isabel Martínez Cano et al.**

*Correspondence to:* Isabel Martínez Cano ([isamcano@gmail.com](mailto:isamcano@gmail.com))

The copyright of individual parts of the supplement might differ from the CC BY 4.0 License.

This supplement includes the following materials:

**Section S1.** Extra tables and figures.

**Table S1.** Sources of field measurement data for tree heights and crown dimensions, methods, site of measurement and the number of data points.

**Table S2.** Parameter estimates (median and 90% posterior interval) for predicting tree height (m) and crown area (m<sup>2</sup>) from trunk diameter (cm) for 162 species.

**Table S3.** Parameter estimates for all the hierarchical models for tree height allometry.

**Table S4.** Parameter estimates for all the hierarchical models for crown area allometry.

**Figure S1.** Tree height allometry for the 162 species analyzed, showing observations and fitted relationships.

**Figure S2.** Crown area allometry for the 162 species analyzed, showing observations and fitted relationships.

**Figure S3.** Extended version of Figure 4 in the main text showing the entire range of observed DBHs.

**References**

**Section S2.** Stan code used to fit alternative allometric models.

**Table S1.** Sources of field measurement data for tree heights and crown dimensions, methods, site of measurement and the number of data points. Where crown areas were not measured directly, they were estimated as pi times the geometric mean crown radius. Where two height measurement methods are listed, the telescoping pole was used on small individuals and the other method on larger individuals.

|          | <b>Source (name)</b>                            | <b>Crown method</b>                                      | <b>Height method</b>                                         | <b>Site</b> | <b>Years</b> | <b>N Crowns</b> | <b>N Heights</b> | <b>Observers</b>                                   | <b>Reference</b>       |
|----------|-------------------------------------------------|----------------------------------------------------------|--------------------------------------------------------------|-------------|--------------|-----------------|------------------|----------------------------------------------------|------------------------|
| <b>1</b> | O'Brien<br>( <i>O'BrienBCI1993</i> )            | 8 radii <sup>1</sup>                                     | Telescoping pole <sup>2</sup> or tangent method <sup>3</sup> | BCI         | 1993         | 171             | 171              | S. O'Brien                                         | O'Brien et al. 1995    |
| <b>2</b> | Spiro<br>( <i>SpiroBCI1993</i> )                | 8 radii <sup>1</sup>                                     | Telescoping pole <sup>2</sup> or tangent method <sup>3</sup> | BCI         | 1993         | 195             | 194              | Spiro                                              | Bohlman & O'Brien 2006 |
| <b>3</b> | Thomas<br>( <i>ThomasBCI2000</i> )              | –                                                        | Telescoping pole <sup>2</sup> or tangent method <sup>3</sup> | BCI         | 2000         | –               | 43               | Thomas                                             | Thomas (unpubl data)   |
| <b>4</b> | Bohlman<br>( <i>BohlmanBCI1997</i> )            | 8 radii <sup>1</sup>                                     | Sine method <sup>4</sup>                                     | BCI         | 1997         | 175             | 182              | S. A. Bohlman                                      | Bohlman & O'Brien 2006 |
| <b>5</b> | Wright<br>( <i>WrightBCI2007</i> )              | 8 radii <sup>1</sup>                                     | Telescoping pole <sup>2</sup> or tangent method <sup>3</sup> | BCI         | 2007         | 760             | 824              | M. C. Ruiz-Jaen & C. Salvador                      | Wright et al. 2010     |
| <b>6</b> | Wright<br>( <i>WrightGigante1998</i> )          | –                                                        | Telescoping pole <sup>2</sup> or tangent method <sup>3</sup> | Gigante     | 1998-1999    | –               | 4720             | A. Peterson, C. Korine, O. Hernandez & R. Gonzalez | NA                     |
| <b>7</b> | Muller-Landau<br>( <i>MullerLandauBCI1996</i> ) | Longest diameter and perpendicular diameter <sup>5</sup> | Telescoping pole <sup>2</sup>                                | BCI         | 1996-1999    | 505             | 1019             | H. Muller-Landau                                   | NA                     |
| <b>8</b> | Muller-Landau<br>( <i>MullerLandauBCI2000</i> ) | –                                                        | Telescoping pole <sup>2</sup> or sine method <sup>4</sup>    | BCI         | –            | –               | 2113             | P. Ramos, P. Villareal                             | NA                     |
| <b>9</b> | Muller-Landau<br>( <i>MullerLandauBCI2014</i> ) | Photogrammetry <sup>6</sup>                              | Photogrammetry minus lidar DEM <sup>7</sup>                  | BCI         | 2014         | 619             | 619              | J. Dandois                                         | NA                     |
|          | <i>Total</i>                                    |                                                          |                                                              |             |              |                 | 2425             |                                                    | 9885                   |

<sup>1</sup> The horizontal distance from the trunk to the vertical projection of the edge of the canopy was measured in eight compass directions 45 degrees apart, including magnetic north.

<sup>2</sup> Height measurements were made with a height-marked telescoping pole for individuals that could be reached by this pole (typically to 5 or 8 m height).

<sup>3</sup> The tangent method involves combining measurements of the angle to the top of the tree and the distance to the base of the tree and calculating height as the distance times the tangent of the angle, with corrections for the height of the observer relative to the base of the tree (see Larjavaara & Muller-Landau 2013). In early studies, the distance to the base of the tree was measured manually; in later studies, with a laser rangefinder.

<sup>4</sup> The sine method is based on measuring the distance to the highest leaf using a laser rangefinder and the angle of that measurement relative to horizontal, and calculating the height as the distance times the sine of the angle (note that the sine is 1 if the measurement is completely vertical), with corrections for the height of the observer relative to the base of the tree (see Larjavaara & Muller-Landau 2013 for details). Modern laser rangefinder models for forestry applications often return the vertical distance directly.

<sup>5</sup> The horizontal distance spanning the longest dimension of the crown was measured together with the perpendicular horizontal dimension of the crown at its widest point.

<sup>6</sup> Overlapping aerial photos taken by an unmanned aerial vehicle in October 2014 were processed using Agisoft Photoscan to obtain a 3D point cloud, from which orthomosaics and canopy surface elevation maps were produced at a resolution of 7 cm (Dandois & Ellis 2013; Graves et al. 2018). The orthomosaic and canopy surface maps were georeferenced by comparison with 2009 1-m resolution airborne lidar data. Individual tree crowns greater than 50 m<sup>2</sup> in area were manually delineated, and were assigned to tagged trees in the 50 ha forest dynamics plot through ground-based field work that also assessed whether they were fully sun-exposed. For fully sun-exposed individuals, crown area was estimated as the area of the delineated crown.

<sup>7</sup> A 1-m ground digital elevation model from airborne LiDAR (2009) was subtracted from the canopy surface elevation calculated from the aerial photos as above to obtain a map of canopy height across the 50 ha plot. For each delineated crown linked to a tagged, fully sun-exposed tree, tree height was assessed as the maximum canopy height within the delineated crown area.

**Table S2.** Posterior, species-level parameter estimates (median and 90% posterior interval) for predicting tree height (m) and crown area (m<sup>2</sup>) from trunk diameter (cm) for the focal species. Unbiased estimates of tree height and crown area can be obtained by multiplying the values predicted by these equations by 1.017 in the case of heights, and 1.163 for crown area, to correct for the bias from back-transforming predicted values of log height and log crown area (Sprugel, 1983). Species taxonomy and mnemonics according to Condit et al. (2017).

| Mnemonic | Species                   | Tree height (generalized Michaelis-Menten, Eq. 3) |                   |                   | Crown area (power function, Eq. 2) |                   |
|----------|---------------------------|---------------------------------------------------|-------------------|-------------------|------------------------------------|-------------------|
|          |                           | a                                                 | b                 | k                 | a                                  | b                 |
| ade1tr   | Adelia triloba            | 57.1 (48.1, 67.9)                                 | 0.66 (0.55, 0.77) | 23.2 (17.7, 29.1) | 0.800 (0.371, 1.783)               | 1.34 (1.07, 1.60) |
| alchco   | Alchornea costaricensis   | 53.0 (44.4, 63.3)                                 | 0.64 (0.57, 0.72) | 18.8 (15.0, 23.2) | 0.553 (0.255, 1.203)               | 1.33 (1.11, 1.55) |
| allops   | Allophylus psilospermus   | 57.9 (48.9, 69.0)                                 | 0.74 (0.63, 0.85) | 22.0 (16.6, 28.0) | 0.660 (0.302, 1.415)               | 1.35 (1.10, 1.62) |
| alsebl   | Alseis blackiana          | 56.2 (48.6, 65.0)                                 | 0.73 (0.71, 0.77) | 21.7 (18.8, 25.0) | 0.228 (0.195, 0.265)               | 1.49 (1.42, 1.54) |
| amaico   | Amaioua corymbosa         | 63.0 (53.0, 75.3)                                 | 0.70 (0.62, 0.77) | 20.7 (16.9, 25.3) | 0.721 (0.378, 1.452)               | 1.30 (1.04, 1.53) |
| anaxex   | Anacardium excelsum       | 48.5 (42.8, 56.3)                                 | 0.82 (0.70, 0.95) | 17.6 (11.1, 24.3) | 0.611 (0.262, 1.387)               | 1.32 (1.15, 1.50) |
| andiin   | Andira inermis            | 63.5 (53.6, 75.5)                                 | 0.74 (0.64, 0.84) | 24.6 (18.7, 31.0) | 0.444 (0.187, 1.051)               | 1.38 (1.12, 1.64) |
| annoac   | Annona acuminata          | 62.2 (52.1, 74.5)                                 | 0.72 (0.59, 0.84) | 23.5 (18.0, 29.4) | 0.669 (0.364, 1.258)               | 1.32 (1.08, 1.55) |
| apeime   | Apeiba membranacea        | 53.9 (46.2, 62.9)                                 | 0.71 (0.65, 0.78) | 18.5 (15.6, 21.6) | 0.997 (0.454, 2.338)               | 1.15 (0.95, 1.34) |
| apeiti   | Apeiba tibourbou          | 42.5 (34.5, 52.3)                                 | 0.78 (0.65, 0.90) | 18.7 (12.9, 25.3) | 0.562 (0.239, 1.299)               | 1.34 (1.09, 1.59) |
| ardife   | Ardisia standleyana       | 62.3 (52.3, 74.2)                                 | 0.62 (0.53, 0.72) | 22.4 (17.9, 27.3) | 0.737 (0.380, 1.415)               | 1.32 (1.07, 1.55) |
| aspicr   | Aspidosperma desmanthum   | 62.5 (54.6, 72.4)                                 | 0.77 (0.72, 0.82) | 19.6 (17.2, 22.5) | 0.692 (0.328, 1.515)               | 1.24 (1.05, 1.42) |
| ast2gr   | Astronium graveolens      | 63.9 (55.3, 74.9)                                 | 0.79 (0.72, 0.85) | 23.7 (19.8, 28.1) | 0.578 (0.234, 1.282)               | 1.30 (1.09, 1.53) |
| beilpe   | Beilschmiedia towarensis  | 52.4 (47.2, 58.4)                                 | 0.91 (0.88, 0.95) | 26.9 (24.2, 30.1) | 0.583 (0.500, 0.677)               | 1.27 (1.21, 1.33) |
| brosal   | Brosimum alicastrum       | 63.2 (56.4, 71.2)                                 | 0.80 (0.77, 0.84) | 29.4 (26.5, 32.9) | 0.939 (0.795, 1.116)               | 1.28 (1.22, 1.33) |
| brosgu   | Brosimum guianense        | 62.0 (52.5, 73.6)                                 | 0.71 (0.64, 0.78) | 19.6 (16.2, 23.5) | 0.790 (0.458, 1.364)               | 1.30 (1.10, 1.51) |
| calolo   | Calophyllum longifolium   | 61.1 (53.3, 71.0)                                 | 0.74 (0.69, 0.79) | 20.7 (17.8, 24.1) | 0.495 (0.267, 0.911)               | 1.37 (1.22, 1.52) |
| caseac   | Casearia aculeata         | 61.7 (52.1, 73.4)                                 | 0.74 (0.63, 0.85) | 23.1 (17.6, 29.0) | 0.603 (0.302, 1.189)               | 1.34 (1.09, 1.57) |
| casear   | Casearia arborea          | 56.4 (47.1, 68.3)                                 | 0.67 (0.59, 0.76) | 17.3 (13.5, 21.9) | 0.624 (0.262, 1.473)               | 1.29 (1.06, 1.53) |
| casesy   | Casearia sylvestris       | 57.7 (48.4, 68.4)                                 | 0.69 (0.58, 0.79) | 22.6 (16.7, 28.9) | 0.594 (0.262, 1.389)               | 1.34 (1.10, 1.60) |
| cassel   | Cassipourea elliptica     | 59.9 (51.2, 70.4)                                 | 0.74 (0.69, 0.80) | 23.5 (19.7, 27.9) | 0.536 (0.313, 0.908)               | 1.39 (1.21, 1.56) |
| cavapl   | Cavanillesia platanifolia | 51.7 (45.5, 60.2)                                 | 0.77 (0.68, 0.87) | 16.9 (12.5, 22.0) | 0.524 (0.220, 1.245)               | 1.21 (1.04, 1.39) |
| cecrin   | Cecropia insignis         | 47.1 (41.6, 54.1)                                 | 0.96 (0.90, 1.03) | 22.9 (20.3, 25.9) | 0.254 (0.195, 0.328)               | 1.65 (1.56, 1.75) |
| cecrob   | Cecropia obtusifolia      | 40.1 (32.3, 50.2)                                 | 0.88 (0.71, 1.05) | 12.4 (7.1, 18.8)  | 0.665 (0.304, 1.678)               | 1.20 (0.93, 1.44) |
| ceibpe   | Ceiba pentandra           | 53.6 (48.1, 60.7)                                 | 0.79 (0.72, 0.88) | 23.8 (20.2, 28.1) | 0.288 (0.143, 0.576)               | 1.51 (1.36, 1.65) |
| celtsc   | Celtis schippii           | 58.8 (50.2, 69.6)                                 | 0.76 (0.69, 0.83) | 20.8 (17.2, 25.1) | 0.633 (0.277, 1.434)               | 1.37 (1.14, 1.63) |
| chr2ar   | Chrysophyllum argenteum   | 57.6 (49.7, 66.3)                                 | 0.79 (0.75, 0.84) | 27.0 (23.4, 31.3) | 0.758 (0.625, 0.924)               | 1.24 (1.13, 1.35) |
| chr2ca   | Chrysophyllum cainito     | 63.0 (53.6, 75.8)                                 | 0.75 (0.65, 0.85) | 22.3 (15.7, 29.3) | 0.585 (0.243, 1.405)               | 1.36 (1.14, 1.58) |
| phoeci   | Cinnamomum triplinerve    | 55.3 (47.2, 65.4)                                 | 0.72 (0.65, 0.81) | 19.2 (15.2, 23.6) | 0.291 (0.133, 0.659)               | 1.39 (1.14, 1.64) |
| conoci   | Conostegia cinnamomea     | 56.9 (48.3, 67.0)                                 | 0.71 (0.55, 0.86) | 24.7 (20.4, 29.6) | 1.380 (0.871, 2.189)               | 1.15 (0.94, 1.36) |
| cordal   | Cordia alliodora          | 56.6 (48.7, 66.4)                                 | 0.82 (0.74, 0.91) | 21.0 (17.0, 25.6) | 0.530 (0.221, 1.312)               | 1.29 (1.05, 1.53) |
| cordbi   | Cordia bicolor            | 49.9 (42.5, 57.9)                                 | 0.86 (0.82, 0.92) | 23.9 (20.5, 27.6) | 0.270 (0.216, 0.335)               | 1.44 (1.35, 1.53) |
| cordla   | Cordia lasiocalyx         | 58.3 (49.4, 69.1)                                 | 0.64 (0.57, 0.71) | 20.1 (16.4, 24.5) | 0.340 (0.200, 0.581)               | 1.36 (1.16, 1.56) |
| cou2cu   | Coussarea curvigemma      | 57.1 (49.1, 66.2)                                 | 0.74 (0.68, 0.80) | 24.2 (20.3, 28.3) | 0.577 (0.360, 0.955)               | 1.31 (1.12, 1.50) |
| crotbi   | Croton billbergianus      | 50.0 (42.0, 59.8)                                 | 0.77 (0.66, 0.87) | 18.9 (14.4, 23.8) | 0.732 (0.336, 1.627)               | 1.34 (1.09, 1.59) |
| cupala   | Cupania latifolia         | 55.9 (47.3, 66.5)                                 | 0.73 (0.63, 0.83) | 21.9 (15.9, 27.9) | 0.612 (0.267, 1.418)               | 1.36 (1.13, 1.60) |
| cupasy   | Cupania seemannii         | 61.4 (51.3, 73.1)                                 | 0.65 (0.57, 0.73) | 19.4 (15.6, 23.8) | 0.800 (0.436, 1.430)               | 1.36 (1.15, 1.59) |
| nectpu   | Damburneya umbrosa        | 55.0 (46.7, 64.9)                                 | 0.74 (0.68, 0.80) | 19.5 (16.1, 23.3) | 0.665 (0.319, 1.384)               | 1.34 (1.09, 1.57) |
| dendar   | Dendropanax arboreus      | 57.1 (48.6, 68.0)                                 | 0.71 (0.62, 0.79) | 24.1 (18.6, 30.2) | 0.531 (0.243, 1.112)               | 1.38 (1.18, 1.59) |
| des2pa   | Desmopsis panamensis      | 60.1 (51.4, 70.6)                                 | 0.67 (0.63, 0.71) | 22.7 (19.2, 26.9) | 0.603 (0.362, 1.016)               | 1.34 (1.13, 1.54) |
| dio2ar   | Diospyros artanthifolia   | 58.8 (49.5, 70.0)                                 | 0.67 (0.60, 0.74) | 17.8 (14.4, 21.8) | 0.470 (0.202, 1.043)               | 1.35 (1.09, 1.61) |
| diptpa   | Dipteryx oleifera         | 64.5 (57.4, 74.4)                                 | 0.80 (0.73, 0.87) | 23.0 (19.5, 26.8) | 0.530 (0.222, 1.178)               | 1.47 (1.30, 1.67) |
| drypst   | Drypetes standleyi        | 55.4 (47.4, 64.3)                                 | 0.78 (0.75, 0.82) | 22.6 (19.5, 26.2) | 0.794 (0.679, 0.933)               | 1.27 (1.19, 1.34) |

**Table S2.** (continued).

| Mnemonic | Species                   | Tree height (generalized Michaelis-Menten, Eq. 3) |                   |                   | Crown area (power function, Eq. 2) |                   |
|----------|---------------------------|---------------------------------------------------|-------------------|-------------------|------------------------------------|-------------------|
|          |                           | a                                                 | b                 | k                 | a                                  | b                 |
| entesc   | Enterolobium schomburgkii | 55.5 (46.8, 66.3)                                 | 0.77 (0.65, 0.89) | 18.9 (13.8, 24.4) | 0.880 (0.452, 1.830)               | 1.23 (0.99, 1.46) |
| ery2ma   | Erythroxylum macrophyllum | 60.6 (51.2, 72.1)                                 | 0.68 (0.57, 0.79) | 23.0 (17.4, 29.3) | 0.544 (0.266, 1.202)               | 1.35 (1.08, 1.61) |
| eugeco   | Eugenia coloradoensis     | 62.5 (53.4, 74.3)                                 | 0.75 (0.69, 0.81) | 22.1 (18.4, 26.7) | 0.560 (0.273, 1.126)               | 1.35 (1.12, 1.57) |
| eugega   | Eugenia galalonensis      | 61.8 (52.7, 73.2)                                 | 0.71 (0.64, 0.78) | 22.0 (18.0, 26.6) | 0.598 (0.341, 1.030)               | 1.33 (1.14, 1.54) |
| eugene   | Eugenia nesiotica         | 61.8 (51.9, 73.6)                                 | 0.72 (0.63, 0.81) | 24.4 (18.9, 30.5) | 0.650 (0.277, 1.386)               | 1.38 (1.15, 1.63) |
| eugeoe   | Eugenia oerstediana       | 54.8 (46.9, 63.1)                                 | 0.77 (0.73, 0.81) | 26.9 (23.0, 31.1) | 0.803 (0.632, 1.020)               | 1.34 (1.23, 1.45) |
| faraoc   | Faramea occidentalis      | 59.1 (50.0, 69.2)                                 | 0.65 (0.61, 0.68) | 20.5 (17.2, 24.3) | 0.663 (0.489, 0.902)               | 1.25 (1.12, 1.38) |
| ficuc2   | Ficus costaricana         | 59.6 (50.6, 71.1)                                 | 0.70 (0.61, 0.79) | 23.4 (17.0, 30.2) | 0.564 (0.233, 1.391)               | 1.18 (0.98, 1.37) |
| ficuma   | Ficus maxima              | 51.6 (43.7, 61.8)                                 | 0.81 (0.69, 0.93) | 19.5 (14.5, 25.3) | 0.382 (0.183, 0.767)               | 1.41 (1.17, 1.65) |
| ficuto   | Ficus tonduzii            | 58.3 (49.3, 69.2)                                 | 0.66 (0.56, 0.77) | 23.3 (18.0, 29.2) | 0.573 (0.260, 1.282)               | 1.33 (1.07, 1.60) |
| ficutr   | Ficus trigonata           | 48.5 (41.8, 57.3)                                 | 0.81 (0.70, 0.93) | 20.4 (15.1, 26.3) | 0.651 (0.314, 1.392)               | 1.30 (1.13, 1.49) |
| ficuyo   | Ficus yoponensis          | 44.1 (37.5, 53.4)                                 | 0.86 (0.74, 1.00) | 16.7 (12.2, 22.2) | 0.491 (0.249, 0.937)               | 1.44 (1.27, 1.61) |
| gar2ma   | Garcinia madruno          | 58.0 (49.4, 68.1)                                 | 0.72 (0.67, 0.77) | 22.8 (19.3, 26.9) | 0.616 (0.275, 1.396)               | 1.36 (1.09, 1.63) |
| gar2in   | Garcinia recondita        | 57.6 (49.8, 66.6)                                 | 0.77 (0.73, 0.81) | 26.7 (22.9, 30.9) | 0.819 (0.675, 0.985)               | 1.26 (1.15, 1.38) |
| geniam   | Genipa americana          | 63.8 (53.3, 77.4)                                 | 0.66 (0.57, 0.76) | 24.0 (18.0, 30.5) | 0.594 (0.249, 1.327)               | 1.40 (1.16, 1.65) |
| guapst   | Guapira standleyana       | 64.4 (55.0, 76.4)                                 | 0.70 (0.65, 0.77) | 21.9 (18.2, 26.1) | 0.597 (0.280, 1.353)               | 1.29 (1.09, 1.49) |
| guarsp   | Guarea bullata            | 61.9 (52.5, 73.2)                                 | 0.70 (0.63, 0.77) | 23.9 (19.8, 28.5) | 0.263 (0.141, 0.474)               | 1.44 (1.25, 1.67) |
| guargr   | Guarea grandifolia        | 59.3 (50.4, 70.1)                                 | 0.74 (0.64, 0.84) | 21.8 (15.5, 28.6) | 0.601 (0.256, 1.403)               | 1.34 (1.13, 1.55) |
| guargu   | Guarea guidonia           | 60.5 (50.5, 73.1)                                 | 0.60 (0.53, 0.66) | 19.5 (15.5, 23.9) | 0.517 (0.239, 1.100)               | 1.32 (1.10, 1.54) |
| guatdu   | Guatteria lucens          | 65.0 (55.8, 76.5)                                 | 0.74 (0.68, 0.81) | 22.0 (18.2, 26.4) | 0.635 (0.314, 1.253)               | 1.29 (1.10, 1.47) |
| guazul   | Guazuma ulmifolia         | 48.3 (39.7, 58.2)                                 | 0.70 (0.62, 0.79) | 15.4 (12.0, 19.4) | 0.618 (0.275, 1.462)               | 1.30 (1.08, 1.52) |
| gustsu   | Gustavia superba          | 54.6 (46.0, 65.2)                                 | 0.69 (0.59, 0.78) | 21.8 (16.8, 27.4) | 0.615 (0.275, 1.364)               | 1.31 (1.08, 1.52) |
| tab1gu   | Handroanthus guayacan     | 58.4 (51.1, 67.5)                                 | 0.80 (0.74, 0.86) | 25.6 (22.4, 29.4) | 0.388 (0.210, 0.685)               | 1.37 (1.23, 1.53) |
| hassfl   | Hasseltia floribunda      | 60.7 (51.1, 72.1)                                 | 0.54 (0.47, 0.62) | 20.3 (16.0, 25.2) | 0.683 (0.339, 1.410)               | 1.28 (1.04, 1.50) |
| heisac   | Heisteria acuminata       | 58.9 (49.9, 69.6)                                 | 0.66 (0.61, 0.71) | 20.5 (17.0, 24.3) | 0.875 (0.439, 1.822)               | 1.32 (1.04, 1.57) |
| heisco   | Heisteria concinna        | 48.2 (39.4, 57.5)                                 | 0.68 (0.65, 0.72) | 15.7 (12.8, 18.8) | 0.652 (0.370, 1.153)               | 1.37 (1.18, 1.55) |
| hyeral   | Hieronyma alchorneoides   | 64.3 (55.3, 76.2)                                 | 0.70 (0.64, 0.77) | 23.0 (18.9, 27.4) | 0.554 (0.234, 1.337)               | 1.38 (1.19, 1.58) |
| hirtam   | Hirtella americana        | 59.3 (49.9, 71.0)                                 | 0.62 (0.56, 0.68) | 17.6 (14.2, 21.5) | 0.485 (0.254, 0.904)               | 1.42 (1.17, 1.67) |
| hirtr    | Hirtella triandra         | 57.3 (48.9, 67.2)                                 | 0.71 (0.68, 0.74) | 23.3 (19.8, 27.3) | 0.927 (0.768, 1.130)               | 1.25 (1.14, 1.36) |
| ingas1   | Inga acuminata            | 54.6 (45.5, 65.2)                                 | 0.67 (0.57, 0.77) | 18.7 (13.6, 24.5) | 0.735 (0.366, 1.456)               | 1.40 (1.17, 1.62) |
| ingago   | Inga goldmanii            | 59.0 (49.8, 70.2)                                 | 0.72 (0.62, 0.82) | 23.1 (17.1, 29.5) | 0.639 (0.271, 1.454)               | 1.37 (1.13, 1.61) |
| ingama   | Inga marginata            | 56.1 (47.2, 67.2)                                 | 0.69 (0.61, 0.77) | 17.5 (13.8, 21.8) | 0.658 (0.264, 1.504)               | 1.40 (1.17, 1.66) |
| ingasa   | Inga sapindoides          | 58.3 (49.5, 69.3)                                 | 0.74 (0.64, 0.83) | 22.9 (17.2, 29.0) | 0.657 (0.295, 1.463)               | 1.38 (1.13, 1.63) |
| ingasp   | Inga spectabilis          | 53.5 (45.3, 63.6)                                 | 0.73 (0.62, 0.83) | 22.1 (16.3, 28.3) | 0.541 (0.233, 1.231)               | 1.37 (1.12, 1.61) |
| ingaum   | Inga umbellifera          | 63.5 (53.0, 76.4)                                 | 0.59 (0.51, 0.66) | 17.2 (14.0, 21.2) | 0.881 (0.408, 1.959)               | 1.32 (1.05, 1.57) |
| jac1co   | Jacaranda copaia          | 51.4 (45.1, 60.0)                                 | 0.75 (0.68, 0.83) | 14.6 (12.3, 17.1) | 0.500 (0.269, 0.977)               | 1.36 (1.20, 1.52) |
| laciag   | Lacistema aggregatum      | 62.0 (52.5, 73.8)                                 | 0.71 (0.66, 0.77) | 21.9 (18.3, 26.4) | 0.467 (0.198, 1.074)               | 1.35 (1.09, 1.63) |
| lacmpa   | Lacmellea panamensis      | 53.4 (44.9, 63.6)                                 | 0.69 (0.62, 0.77) | 17.4 (14.0, 21.3) | 0.538 (0.245, 1.371)               | 1.31 (1.06, 1.55) |
| laetpr   | Laetia procera            | 48.2 (40.6, 57.8)                                 | 0.81 (0.71, 0.93) | 17.2 (13.2, 21.8) | 0.591 (0.253, 1.422)               | 1.40 (1.16, 1.63) |
| laetth   | Laetia thamnia            | 60.3 (50.8, 72.1)                                 | 0.65 (0.59, 0.70) | 18.0 (14.8, 21.7) | 0.705 (0.311, 1.577)               | 1.38 (1.10, 1.65) |
| licahy   | Licania hypoleuca         | 62.5 (52.6, 74.2)                                 | 0.67 (0.63, 0.71) | 20.7 (17.2, 24.8) | 0.725 (0.323, 1.560)               | 1.36 (1.11, 1.61) |
| licapl   | Licania platypus          | 61.0 (51.7, 72.8)                                 | 0.72 (0.63, 0.82) | 23.4 (17.5, 29.7) | 0.639 (0.310, 1.432)               | 1.24 (1.00, 1.44) |
| lindla   | Lindackeria laurina       | 57.4 (48.2, 68.6)                                 | 0.71 (0.60, 0.80) | 23.3 (17.5, 29.3) | 0.488 (0.219, 1.090)               | 1.35 (1.10, 1.59) |
| loncla   | Lonchocarpus heptaphyllus | 63.9 (54.5, 75.5)                                 | 0.75 (0.70, 0.81) | 21.4 (17.8, 25.7) | 0.189 (0.112, 0.320)               | 1.53 (1.38, 1.70) |
| luehse   | Luehea seemannii          | 55.1 (48.7, 62.9)                                 | 0.78 (0.74, 0.83) | 26.9 (23.6, 30.5) | 0.526 (0.230, 1.262)               | 1.33 (1.13, 1.52) |
| macrgl   | Macrocnemum roseum        | 59.4 (50.2, 70.6)                                 | 0.71 (0.61, 0.81) | 23.7 (17.6, 30.0) | 0.569 (0.247, 1.312)               | 1.30 (1.06, 1.54) |

**Table S2.** (continued).

| Mnemonic | Species                                  | Tree height (generalized Michaelis-Menten, Eq. 3) |                   |                   | Crown area (power function, Eq. 2) |                   |
|----------|------------------------------------------|---------------------------------------------------|-------------------|-------------------|------------------------------------|-------------------|
|          |                                          | a                                                 | b                 | k                 | a                                  | b                 |
| maquco   | Maquira guianensis                       | 59.1 (50.2, 69.5)                                 | 0.68 (0.63, 0.74) | 21.2 (17.6, 25.4) | 0.517 (0.297, 0.902)               | 1.33 (1.12, 1.53) |
| mar1la   | Marila laxiflora                         | 56.2 (48.0, 65.9)                                 | 0.64 (0.51, 0.77) | 23.0 (19.1, 27.6) | 0.647 (0.406, 1.032)               | 1.33 (1.13, 1.52) |
| maytsc   | Maytenus schippii                        | 61.4 (51.8, 73.6)                                 | 0.75 (0.64, 0.85) | 21.7 (15.5, 28.0) | 0.525 (0.226, 1.230)               | 1.34 (1.07, 1.61) |
| micoar   | Miconia argentea                         | 50.8 (42.7, 60.1)                                 | 0.79 (0.74, 0.85) | 18.2 (15.3, 21.7) | 0.626 (0.480, 0.814)               | 1.34 (1.22, 1.46) |
| micone   | Miconia nervosa                          | 54.9 (46.3, 64.2)                                 | 0.70 (0.56, 0.84) | 24.3 (19.9, 29.2) | 0.862 (0.556, 1.301)               | 1.26 (1.06, 1.46) |
| malmosp  | Mosannonna garwoodii                     | 60.1 (50.8, 70.9)                                 | 0.70 (0.65, 0.76) | 20.4 (16.9, 24.3) | 0.468 (0.212, 1.030)               | 1.37 (1.11, 1.62) |
| mourmy   | Mouriri myrtilloides                     | 62.5 (52.7, 74.2)                                 | 0.51 (0.46, 0.57) | 19.4 (16.2, 23.4) | 0.898 (0.579, 1.406)               | 1.32 (1.12, 1.53) |
| myrcga   | Myrcia splendens tip. gatunensis         | 61.2 (51.5, 73.5)                                 | 0.64 (0.56, 0.72) | 17.8 (14.3, 21.8) | 0.642 (0.325, 1.301)               | 1.34 (1.08, 1.58) |
| myrofr   | Myrospermum frutescens                   | 66.4 (55.8, 79.6)                                 | 0.76 (0.65, 0.86) | 20.7 (14.6, 27.4) | 0.423 (0.180, 0.923)               | 1.47 (1.24, 1.73) |
| nectci   | Nectandra cissiflora                     | 55.6 (46.3, 66.4)                                 | 0.75 (0.62, 0.87) | 17.2 (11.6, 23.6) | 0.518 (0.238, 1.146)               | 1.35 (1.10, 1.61) |
| ochrpy   | Ochroma pyramidale                       | 34.6 (28.1, 44.7)                                 | 0.90 (0.73, 1.08) | 13.4 (6.4, 21.0)  | 0.702 (0.260, 1.815)               | 1.39 (1.14, 1.64) |
| ocotob   | Ocotea oblonga                           | 51.4 (43.2, 61.2)                                 | 0.75 (0.64, 0.85) | 20.5 (14.7, 26.5) | 0.562 (0.239, 1.312)               | 1.31 (1.07, 1.54) |
| ocotpu   | Ocotea puberula                          | 56.5 (47.9, 67.1)                                 | 0.75 (0.65, 0.86) | 20.9 (14.6, 27.9) | 0.584 (0.232, 1.364)               | 1.37 (1.14, 1.60) |
| ocotwh   | Ocotea whitei                            | 57.4 (49.3, 67.6)                                 | 0.78 (0.69, 0.88) | 22.0 (16.9, 27.5) | 0.717 (0.339, 1.584)               | 1.24 (1.04, 1.43) |
| ormocr   | Ormosia coccinea                         | 60.0 (51.0, 71.6)                                 | 0.77 (0.66, 0.88) | 21.3 (15.9, 27.0) | 0.391 (0.192, 0.850)               | 1.33 (1.13, 1.55) |
| ormoma   | Ormosia macrocalyx                       | 58.2 (50.1, 68.2)                                 | 0.81 (0.73, 0.91) | 28.1 (23.2, 33.5) | 0.264 (0.150, 0.467)               | 1.43 (1.26, 1.61) |
| ouralu   | Ouratea lucens                           | 66.2 (55.9, 79.0)                                 | 0.74 (0.67, 0.82) | 21.2 (17.6, 25.6) | 0.288 (0.147, 0.527)               | 1.47 (1.24, 1.72) |
| pochse   | Pachira sessilis                         | 58.1 (50.2, 68.3)                                 | 0.78 (0.72, 0.84) | 20.4 (17.2, 24.4) | 0.504 (0.299, 0.861)               | 1.25 (1.07, 1.41) |
| perexa   | Perebea xanthochyma                      | 59.7 (50.6, 70.9)                                 | 0.66 (0.62, 0.71) | 19.7 (16.5, 23.4) | 0.666 (0.306, 1.493)               | 1.33 (1.06, 1.58) |
| picrla   | Picramnia latifolia                      | 63.4 (53.2, 76.2)                                 | 0.56 (0.48, 0.64) | 19.7 (15.7, 24.3) | 0.147 (0.070, 0.281)               | 1.77 (1.54, 2.04) |
| pipere   | Piper reticulatum                        | 56.7 (48.3, 67.3)                                 | 0.72 (0.60, 0.84) | 22.1 (17.0, 27.8) | 0.660 (0.338, 1.342)               | 1.32 (1.04, 1.56) |
| pla1pi   | Platymiscium pinnatum                    | 65.7 (56.1, 78.3)                                 | 0.68 (0.60, 0.75) | 18.7 (14.7, 23.3) | 0.479 (0.199, 1.174)               | 1.35 (1.12, 1.56) |
| pla2el   | Platyodium elegans                       | 59.3 (52.0, 68.8)                                 | 0.77 (0.70, 0.85) | 23.3 (19.9, 27.3) | 0.811 (0.353, 1.804)               | 1.22 (1.04, 1.41) |
| hybapr   | Pombalia prunifolia                      | 61.8 (52.3, 72.8)                                 | 0.51 (0.45, 0.58) | 22.6 (19.0, 27.0) | 0.834 (0.508, 1.365)               | 1.26 (1.05, 1.47) |
| poular   | Poulsenia armata                         | 57.4 (51.4, 64.8)                                 | 0.86 (0.82, 0.91) | 33.1 (29.4, 37.4) | 0.332 (0.168, 0.636)               | 1.32 (1.16, 1.50) |
| pourbi   | Pourouma bicolor                         | 51.1 (42.4, 61.2)                                 | 0.71 (0.64, 0.78) | 16.4 (13.4, 19.8) | 0.600 (0.237, 1.520)               | 1.39 (1.14, 1.65) |
| poutre   | Pouteria reticulata                      | 63.3 (54.5, 75.0)                                 | 0.71 (0.66, 0.75) | 20.6 (17.5, 24.5) | 0.690 (0.400, 1.225)               | 1.32 (1.16, 1.47) |
| pri2co   | Prioria copaifera                        | 60.1 (55.4, 65.7)                                 | 0.86 (0.83, 0.89) | 36.5 (33.9, 39.5) | 0.908 (0.787, 1.050)               | 1.18 (1.14, 1.22) |
| protsp   | Protium confusum                         | 54.5 (45.5, 64.7)                                 | 0.68 (0.62, 0.75) | 16.7 (13.7, 20.2) | 0.760 (0.482, 1.179)               | 1.25 (1.05, 1.44) |
| protco   | Protium costaricense                     | 60.8 (51.0, 72.9)                                 | 0.61 (0.54, 0.69) | 19.3 (15.2, 23.9) | 0.661 (0.328, 1.308)               | 1.38 (1.14, 1.61) |
| protpa   | Protium panamense                        | 61.8 (52.2, 73.8)                                 | 0.68 (0.65, 0.72) | 19.8 (16.7, 23.7) | 0.356 (0.201, 0.636)               | 1.42 (1.22, 1.62) |
| protte   | Protium tenuifolium subsp. sessiliflorum | 50.1 (40.8, 59.7)                                 | 0.75 (0.71, 0.81) | 21.2 (17.5, 25.2) | 0.565 (0.436, 0.743)               | 1.37 (1.26, 1.47) |
| pse1se   | Pseudobombax septenatum                  | 52.7 (45.6, 62.2)                                 | 0.80 (0.70, 0.90) | 20.6 (14.6, 26.9) | 0.550 (0.240, 1.351)               | 1.28 (1.06, 1.48) |
| psycma   | Psychotria marginata                     | 56.9 (48.5, 66.6)                                 | 0.68 (0.55, 0.81) | 26.1 (21.5, 31.0) | 0.552 (0.347, 0.868)               | 1.36 (1.17, 1.56) |
| pterro   | Pterocarpus hayesii                      | 62.8 (53.9, 73.8)                                 | 0.75 (0.69, 0.81) | 23.3 (19.8, 27.6) | 0.534 (0.289, 1.044)               | 1.37 (1.17, 1.55) |
| quaras   | Quararibea asterolepis                   | 57.8 (52.1, 64.6)                                 | 0.86 (0.82, 0.89) | 32.0 (29.1, 35.5) | 1.052 (0.884, 1.253)               | 1.09 (1.03, 1.14) |
| quasam   | Quassia amara                            | 63.9 (53.9, 76.2)                                 | 0.56 (0.50, 0.62) | 21.5 (17.8, 26.0) | 0.591 (0.280, 1.264)               | 1.34 (1.07, 1.60) |
| randar   | Randia armata                            | 61.3 (51.8, 72.9)                                 | 0.52 (0.45, 0.60) | 20.6 (16.3, 25.4) | 0.771 (0.351, 1.651)               | 1.35 (1.11, 1.59) |
| rinoty   | Rinorea sylvatica                        | 61.2 (52.3, 71.6)                                 | 0.64 (0.59, 0.69) | 24.9 (21.1, 29.4) | 1.095 (0.593, 2.023)               | 1.27 (1.03, 1.50) |
| sapiau   | Sapium glandulosum                       | 57.1 (49.2, 67.2)                                 | 0.80 (0.71, 0.90) | 22.2 (16.6, 28.3) | 0.489 (0.206, 1.084)               | 1.40 (1.19, 1.63) |
| simaam   | Simarouba amara                          | 39.9 (35.8, 44.8)                                 | 1.01 (0.97, 1.06) | 21.9 (19.7, 24.6) | 0.538 (0.458, 0.631)               | 1.32 (1.25, 1.40) |
| sipacr   | Siparuna cristata                        | 58.6 (49.3, 69.6)                                 | 0.76 (0.64, 0.89) | 21.7 (16.7, 27.3) | 0.680 (0.358, 1.274)               | 1.30 (1.06, 1.55) |
| sloate   | Sloanea terniflora                       | 55.7 (49.4, 62.8)                                 | 0.92 (0.87, 0.97) | 33.0 (29.4, 37.0) | 0.546 (0.429, 0.690)               | 1.35 (1.27, 1.43) |
| soroaf   | Sorocea affinis                          | 61.6 (52.1, 72.8)                                 | 0.61 (0.57, 0.65) | 21.5 (17.9, 25.6) | 0.356 (0.210, 0.611)               | 1.37 (1.16, 1.58) |
| sponmo   | Spondias mombin                          | 50.1 (42.4, 59.7)                                 | 0.78 (0.68, 0.89) | 20.0 (14.2, 26.3) | 0.526 (0.223, 1.248)               | 1.42 (1.21, 1.63) |
| sponra   | Spondias radlkoferi                      | 54.2 (47.1, 62.2)                                 | 0.80 (0.76, 0.85) | 28.3 (24.5, 32.3) | 0.238 (0.179, 0.314)               | 1.54 (1.44, 1.65) |
| sterap   | Sterculia apetala                        | 59.3 (52.3, 67.5)                                 | 0.82 (0.76, 0.89) | 26.9 (23.2, 31.2) | 0.487 (0.247, 0.966)               | 1.39 (1.23, 1.57) |

**Table S2.** (continued).

| Mnemonic | Species                             | Tree height (generalized Michaelis-Menten, Eq. 3) |                   |                   | Crown area (power function, Eq. 2) |                   |
|----------|-------------------------------------|---------------------------------------------------|-------------------|-------------------|------------------------------------|-------------------|
|          |                                     | a                                                 | b                 | k                 | a                                  | b                 |
| swars2   | Swartzia simplex var. continentalis | 64.6 (54.4, 76.7)                                 | 0.60 (0.56, 0.64) | 22.1 (18.5, 26.5) | 0.378 (0.216, 0.637)               | 1.55 (1.37, 1.75) |
| swars1   | Swartzia simplex var. grandiflora   | 64.9 (54.6, 78.0)                                 | 0.56 (0.50, 0.62) | 18.6 (15.0, 23.0) | 0.482 (0.254, 0.870)               | 1.48 (1.30, 1.69) |
| sympgl   | Symphonia globulifera               | 58.6 (49.8, 69.9)                                 | 0.78 (0.67, 0.88) | 20.5 (14.1, 27.0) | 0.546 (0.227, 1.295)               | 1.36 (1.13, 1.61) |
| tab1ro   | Tabebuia rosea                      | 58.9 (52.3, 66.5)                                 | 0.92 (0.86, 0.98) | 28.8 (25.5, 32.6) | 0.384 (0.289, 0.506)               | 1.42 (1.33, 1.51) |
| tab2ar   | Tabernaemontana arborea             | 62.0 (53.5, 73.3)                                 | 0.66 (0.61, 0.71) | 23.4 (19.5, 27.8) | 0.552 (0.298, 1.013)               | 1.29 (1.13, 1.45) |
| tachve   | Tachigali panamensis                | 49.7 (44.1, 55.8)                                 | 0.97 (0.92, 1.03) | 28.9 (26.0, 32.2) | 0.647 (0.540, 0.778)               | 1.43 (1.36, 1.49) |
| talipr   | Talisia croatii                     | 63.0 (53.1, 75.3)                                 | 0.73 (0.61, 0.85) | 23.8 (18.1, 30.1) | 0.131 (0.064, 0.260)               | 1.48 (1.23, 1.75) |
| taline   | Talisia nervosa                     | 65.2 (54.7, 77.4)                                 | 0.60 (0.55, 0.66) | 23.5 (19.4, 28.1) | 0.216 (0.103, 0.436)               | 1.48 (1.23, 1.75) |
| termam   | Terminalia amazonia                 | 58.7 (50.5, 69.3)                                 | 0.77 (0.66, 0.88) | 19.4 (13.7, 25.8) | 0.556 (0.232, 1.316)               | 1.44 (1.21, 1.66) |
| termob   | Terminalia oblonga                  | 59.9 (52.2, 69.7)                                 | 0.85 (0.77, 0.93) | 25.0 (20.6, 30.0) | 0.624 (0.281, 1.390)               | 1.43 (1.23, 1.63) |
| tet2pa   | Tetragastris panamensis             | 57.0 (50.0, 65.2)                                 | 0.72 (0.70, 0.75) | 19.9 (17.5, 22.8) | 0.467 (0.397, 0.556)               | 1.46 (1.40, 1.52) |
| tocopi   | Tocoyena pittieri                   | 53.3 (45.0, 63.7)                                 | 0.73 (0.63, 0.83) | 22.4 (17.2, 28.1) | 0.678 (0.339, 1.314)               | 1.32 (1.12, 1.53) |
| tratas   | Trattinnickia aspera                | 50.4 (42.7, 60.5)                                 | 0.74 (0.64, 0.84) | 14.9 (11.7, 18.6) | 0.537 (0.221, 1.255)               | 1.36 (1.13, 1.58) |
| tremmi   | Trema micrantha                     | 38.6 (31.0, 49.0)                                 | 0.88 (0.72, 1.04) | 15.0 (8.4, 22.4)  | 0.605 (0.241, 1.403)               | 1.42 (1.20, 1.66) |
| tri2pa   | Trichilia pallida                   | 57.1 (48.3, 68.0)                                 | 0.68 (0.58, 0.78) | 23.3 (17.5, 29.3) | 0.598 (0.266, 1.327)               | 1.35 (1.10, 1.60) |
| tri2tu   | Trichilia tuberculata               | 57.9 (51.0, 65.7)                                 | 0.83 (0.80, 0.85) | 27.7 (24.4, 31.5) | 0.847 (0.728, 0.988)               | 1.19 (1.13, 1.24) |
| tripcu   | Triplaris cumingiana                | 59.0 (50.4, 70.4)                                 | 0.79 (0.68, 0.90) | 19.8 (13.4, 26.4) | 0.474 (0.204, 1.150)               | 1.27 (1.01, 1.50) |
| turpoc   | Turpinia occidentalis               | 48.5 (40.3, 57.8)                                 | 0.72 (0.62, 0.81) | 22.5 (17.0, 28.5) | 0.561 (0.232, 1.448)               | 1.20 (0.94, 1.43) |
| unonpi   | Unonopsis pittieri                  | 58.5 (49.5, 69.7)                                 | 0.76 (0.66, 0.87) | 21.3 (15.4, 27.7) | 0.428 (0.194, 1.007)               | 1.30 (1.03, 1.55) |
| virosp   | Virola multiflora                   | 55.3 (47.4, 64.7)                                 | 0.78 (0.72, 0.84) | 20.2 (17.1, 23.8) | 0.489 (0.217, 1.306)               | 1.31 (1.06, 1.53) |
| viroso   | Virola nobilis                      | 65.0 (57.2, 75.4)                                 | 0.76 (0.71, 0.81) | 24.1 (20.9, 27.8) | 0.477 (0.231, 1.056)               | 1.35 (1.15, 1.52) |
| virose   | Virola sebifera                     | 57.9 (49.7, 67.4)                                 | 0.79 (0.75, 0.84) | 24.4 (21.0, 28.2) | 0.871 (0.499, 1.553)               | 1.19 (1.01, 1.36) |
| vochfe   | Vochysia ferruginea                 | 50.0 (41.8, 59.8)                                 | 0.78 (0.66, 0.90) | 18.4 (13.1, 24.4) | 0.470 (0.210, 1.030)               | 1.42 (1.18, 1.67) |
| xyl1ma   | Xylopia macrantha                   | 54.0 (46.0, 63.9)                                 | 0.76 (0.72, 0.79) | 19.1 (16.1, 22.6) | 0.992 (0.537, 1.908)               | 1.24 (1.02, 1.45) |
| zantbe   | Zanthoxylum ekmanii                 | 44.1 (38.3, 52.4)                                 | 0.89 (0.77, 1.01) | 16.8 (13.1, 21.0) | 0.442 (0.200, 0.950)               | 1.41 (1.21, 1.62) |
| zantp1   | Zanthoxylum panamense               | 60.1 (50.9, 71.5)                                 | 0.77 (0.67, 0.88) | 20.1 (14.1, 26.7) | 0.496 (0.206, 1.111)               | 1.43 (1.21, 1.67) |

**Table S3.** Posterior estimates of the parameters of the hierarchical models for tree height allometry. Table entries correspond to the mean and 90% posterior central intervals for the community level parameters of each allometric function (see Eq. 5 in Methods).

*Posterior parameter estimates for tree height models*

| Functional form | Covariate    |   | $\alpha$ (Mean)            | $\beta$ (Slope)                 | $\sigma$ (Variation)        |
|-----------------|--------------|---|----------------------------|---------------------------------|-----------------------------|
| gMM             | Growth       | a | 57.05 (54.48, 59.97)       | -0.09332 (-0.133, -0.04791)     | 0.1075 (0.08175, 0.1373)    |
|                 |              | b | 0.7348 (0.7176, 0.7524)    | 0.0374 (0.01427, 0.06038)       | 0.09253 (0.08194, 0.105)    |
|                 |              | k | 21.77 (20.7, 22.89)        | -1.801 (-2.812, -0.7942)        | 4.176 (3.637, 4.801)        |
| gMM             | Wood density | a | 57.08 (54.65, 59.91)       | 0.03953 (-0.002625, 0.08066)    | 0.09861 (0.07084, 0.1275)   |
|                 |              | b | 0.7321 (0.7153, 0.7487)    | -0.02491 (-0.04179, -0.007441)  | 0.09084 (0.08043, 0.1031)   |
|                 |              | k | 21.75 (20.74, 22.86)       | -0.1737 (-1.14, 0.8306)         | 4.123 (3.604, 4.746)        |
| gMM             | Mortality    | a | 57.24 (54.65, 60.29)       | -0.0717 (-0.1192, -0.02381)     | 0.09581 (0.06977, 0.1238)   |
|                 |              | b | 0.7323 (0.715, 0.7495)     | 0.02643 (0.007359, 0.04402)     | 0.09153 (0.08104, 0.1033)   |
|                 |              | k | 21.81 (20.7, 23.01)        | -0.9538 (-2.126, 0.1576)        | 4.14 (3.631, 4.74)          |
| gMM             | None         | a | 57.17 (54.69, 59.87)       |                                 | 0.1012 (0.07492, 0.1295)    |
|                 |              | b | 0.7278 (0.7113, 0.7456)    |                                 | 0.0929 (0.08251, 0.1057)    |
|                 |              | k | 21.57 (20.54, 22.66)       |                                 | 4.194 (3.666, 4.822)        |
| <hr/>           |              |   |                            |                                 |                             |
| Power           | Growth       | a | 3.029 (2.936, 3.125)       | 0.05567 (0.03785, 0.07331)      | 0.1021 (0.0905, 0.1154)     |
|                 |              | b | 0.5576 (0.5465, 0.5687)    | -0.03353 (-0.04574, -0.02132)   | 0.06988 (0.06218, 0.07942)  |
| Power           | Wood density | a | 2.988 (2.896, 3.082)       | -0.0006186 (-0.01776, 0.01625)  | 0.1117 (0.09968, 0.1257)    |
|                 |              | b | 0.5609 (0.5501, 0.5723)    | 0.01287 (0.001632, 0.02434)     | 0.0707 (0.06283, 0.07958)   |
| Power           | Mortality    | a | 2.994 (2.902, 3.091)       | 0.01294 (-0.004155, 0.03049)    | 0.1116 (0.09976, 0.1254)    |
|                 |              | b | 0.5604 (0.5489, 0.5714)    | -0.01608 (-0.02736, -0.004805)  | 0.07063 (0.06258, 0.08001)  |
| Power           | None         | a | 2.979 (2.888, 3.076)       |                                 | 0.1113 (0.09941, 0.1253)    |
|                 |              | b | 0.5616 (0.5501, 0.573)     |                                 | 0.07094 (0.06295, 0.08077)  |
| <hr/>           |              |   |                            |                                 |                             |
| Weibull         | Growth       | a | 40.99 (39.52, 42.56)       | -2.06 (-3.15, -0.7914)          | 4.089 (3.202, 5.097)        |
|                 |              | b | 0.0675 (0.06473, 0.07056)  | 0.004051 (0.001157, 0.006867)   | 0.01169 (0.009993, 0.01369) |
|                 |              | k | 0.6995 (0.6844, 0.7145)    | 0.02407 (0.00513, 0.04369)      | 0.08835 (0.07873, 0.09955)  |
| Weibull         | Wood density | a | 40.98 (39.53, 42.52)       | 0.5059 (-0.7509, 1.743)         | 3.981 (3.094, 5.009)        |
|                 |              | b | 0.06717 (0.06442, 0.07025) | 0.001369 (-0.001021, 0.003836)  | 0.01157 (0.009918, 0.01366) |
|                 |              | k | 0.6976 (0.6835, 0.7125)    | -0.01604 (-0.03077, -0.001495)  | 0.0871 (0.07755, 0.09825)   |
| Weibull         | Mortality    | a | 41.09 (39.57, 42.68)       | -1.287 (-2.798, 0.1783)         | 3.886 (3.022, 4.896)        |
|                 |              | b | 0.06712 (0.06412, 0.07019) | 0.0008289 (-0.001922, 0.003454) | 0.01155 (0.009865, 0.0135)  |
|                 |              | k | 0.6978 (0.6829, 0.7129)    | 0.01537 (-0.0008984, 0.03091)   | 0.08763 (0.07749, 0.09876)  |
| Weibull         | None         | a | 40.99 (39.53, 42.59)       |                                 | 4.081 (3.148, 5.095)        |
|                 |              | b | 0.06767 (0.06469, 0.07072) |                                 | 0.01191 (0.01016, 0.01385)  |
|                 |              | k | 0.6954 (0.6809, 0.7106)    |                                 | 0.08858 (0.07873, 0.1004)   |



**Table S4.** Posterior estimates of the parameters of the hierarchical models for crown area allometry. Table entries correspond to the mean and 90% posterior central intervals for the community level parameters of each allometric function (see Eq. 5 in Methods).

*Posterior parameter estimates for crown area models*

| Functional form | Covariate    |   | $\alpha$ (Mean)               | $\beta$ (Slope)                     | $\sigma$ (Variation)             |
|-----------------|--------------|---|-------------------------------|-------------------------------------|----------------------------------|
| gMM             | Growth       | a | 418 (363.4, 473.2)            | 0.08395 (-0.03009, 0.1973)          | 0.3042 (0.2406, 0.3647)          |
|                 |              | b | 1.427 (1.395, 1.461)          | 0.02819 (-0.007316, 0.06313)        | 0.09068 (0.07131, 0.1141)        |
|                 |              | k | 780.3 (694.9, 868.7)          | 93.05 (11.69, 170.7)                | 160.6 (33.13, 226.8)             |
| gMM             | Wood density | a | 423.8 (366.1, 485.5)          | -0.02087 (-0.1385, 0.09542)         | 0.3172 (0.2575, 0.3783)          |
|                 |              | b | 1.424 (1.391, 1.459)          | -0.004723 (-0.03743, 0.03022)       | 0.0978 (0.07692, 0.1208)         |
|                 |              | k | 775.9 (690.5, 869.8)          | -48.16 (-124.3, 25.78)              | 141 (41.78, 227.7)               |
| gMM             | Mortality    | a | 411.5 (362, 471.1)            | 0.05977 (-0.05878, 0.1709)          | 0.3052 (0.252, 0.3663)           |
|                 |              | b | 1.428 (1.397, 1.46)           | 0.03795 (0.005023, 0.06967)         | 0.09006 (0.0716, 0.1121)         |
|                 |              | k | 771.8 (688.1, 864.7)          | 70.19 (3.028, 133.6)                | 158.4 (87.77, 221.3)             |
| gMM             | None         | a | 423.3 (373.3, 484.4)          |                                     | 0.3114 (0.2512, 0.3757)          |
|                 |              | b | 1.421 (1.39, 1.456)           |                                     | 0.09434 (0.07534, 0.1175)        |
|                 |              | k | 768.3 (699.7, 864.6)          |                                     | 164.1 (71.55, 239.1)             |
| <hr/>           |              |   |                               |                                     |                                  |
| Power           | Growth       | a | 0.568 (0.5075, 0.6384)        | 0.02852 (-0.02939, 0.08544)         | 0.3065 (0.2644, 0.3537)          |
|                 |              | b | 1.34 (1.303, 1.374)           | 0.005619 (-0.03522, 0.04613)        | 0.1511 (0.1176, 0.1916)          |
| Power           | Wood density | a | 0.5571 (0.4981, 0.6282)       | 0.05064 (-0.001368, 0.1046)         | 0.3033 (0.2598, 0.3533)          |
|                 |              | b | 1.346 (1.309, 1.38)           | 0.01092 (-0.02278, 0.04919)         | 0.1534 (0.1213, 0.1927)          |
| Power           | Mortality    | a | 0.5689 (0.5029, 0.6385)       | 0.02877 (-0.02567, 0.07852)         | 0.3096 (0.2662, 0.3556)          |
|                 |              | b | 1.339 (1.305, 1.375)          | 0.001199 (-0.03549, 0.03631)        | 0.1538 (0.1209, 0.1942)          |
| Power           | None         | a | 0.5659 (0.5032, 0.6346)       |                                     | 0.3033 (0.2593, 0.3518)          |
|                 |              | b | 1.341 (1.306, 1.376)          |                                     | 0.1558 (0.1241, 0.1953)          |
| <hr/>           |              |   |                               |                                     |                                  |
| Weibull         | Growth       | a | 469.1 (408.2, 540)            | 50.35 (-7.432, 103.7)               | 114 (73.99, 149.8)               |
|                 |              | b | 0.0012 (0.001036, 0.001413)   | -0.0001886 (-0.0003151, -7.218e-05) | 0.0002285 (0.0001421, 0.0003643) |
|                 |              | k | 1.397 (1.372, 1.43)           | 0.0385 (0.008854, 0.0715)           | 0.0859 (0.06889, 0.1032)         |
| Weibull         | Wood density | a | 477.1 (406.8, 558.8)          | -46.71 (-99.32, 10.12)              | 124.9 (82.05, 154.6)             |
|                 |              | b | 0.001211 (0.001036, 0.001415) | 0.0002207 (3.596e-05, 0.0003439)    | 0.0001932 (0.0001311, 0.0003464) |
|                 |              | k | 1.395 (1.365, 1.42)           | -0.003965 (-0.0363, 0.02225)        | 0.08728 (0.07315, 0.1057)        |
| Weibull         | Mortality    | a | 466.9 (408, 531.5)            | 57.68 (12.43, 93.66)                | 114.3 (87.85, 144.1)             |
|                 |              | b | 0.001226 (0.001064, 0.001418) | -0.0002813 (-0.0003917, -0.0001416) | 0.0002179 (0.0001356, 0.0003161) |
|                 |              | k | 1.397 (1.371, 1.424)          | 0.04507 (0.01622, 0.07342)          | 0.08366 (0.06676, 0.103)         |
| Weibull         | None         | a | 486.7 (422.1, 559.4)          |                                     | 115.6 (52.38, 158.1)             |
|                 |              | b | 0.001174 (0.001009, 0.001351) |                                     | 0.0002555 (6.624e-05, 0.0003783) |
|                 |              | k | 1.389 (1.364, 1.416)          |                                     | 0.08765 (0.07073, 0.1066)        |

**Figure S1.** Species-specific relationships of tree height with trunk diameter, showing the data (points) and fitted relationships (solid lines) together with their 90% posterior central intervals (dashed lines). The annotations on each plot detail sample size ( $n$ ) and the observed range of tree heights ( $H$ ) for each species. Note the log-log axes (multiple pages).

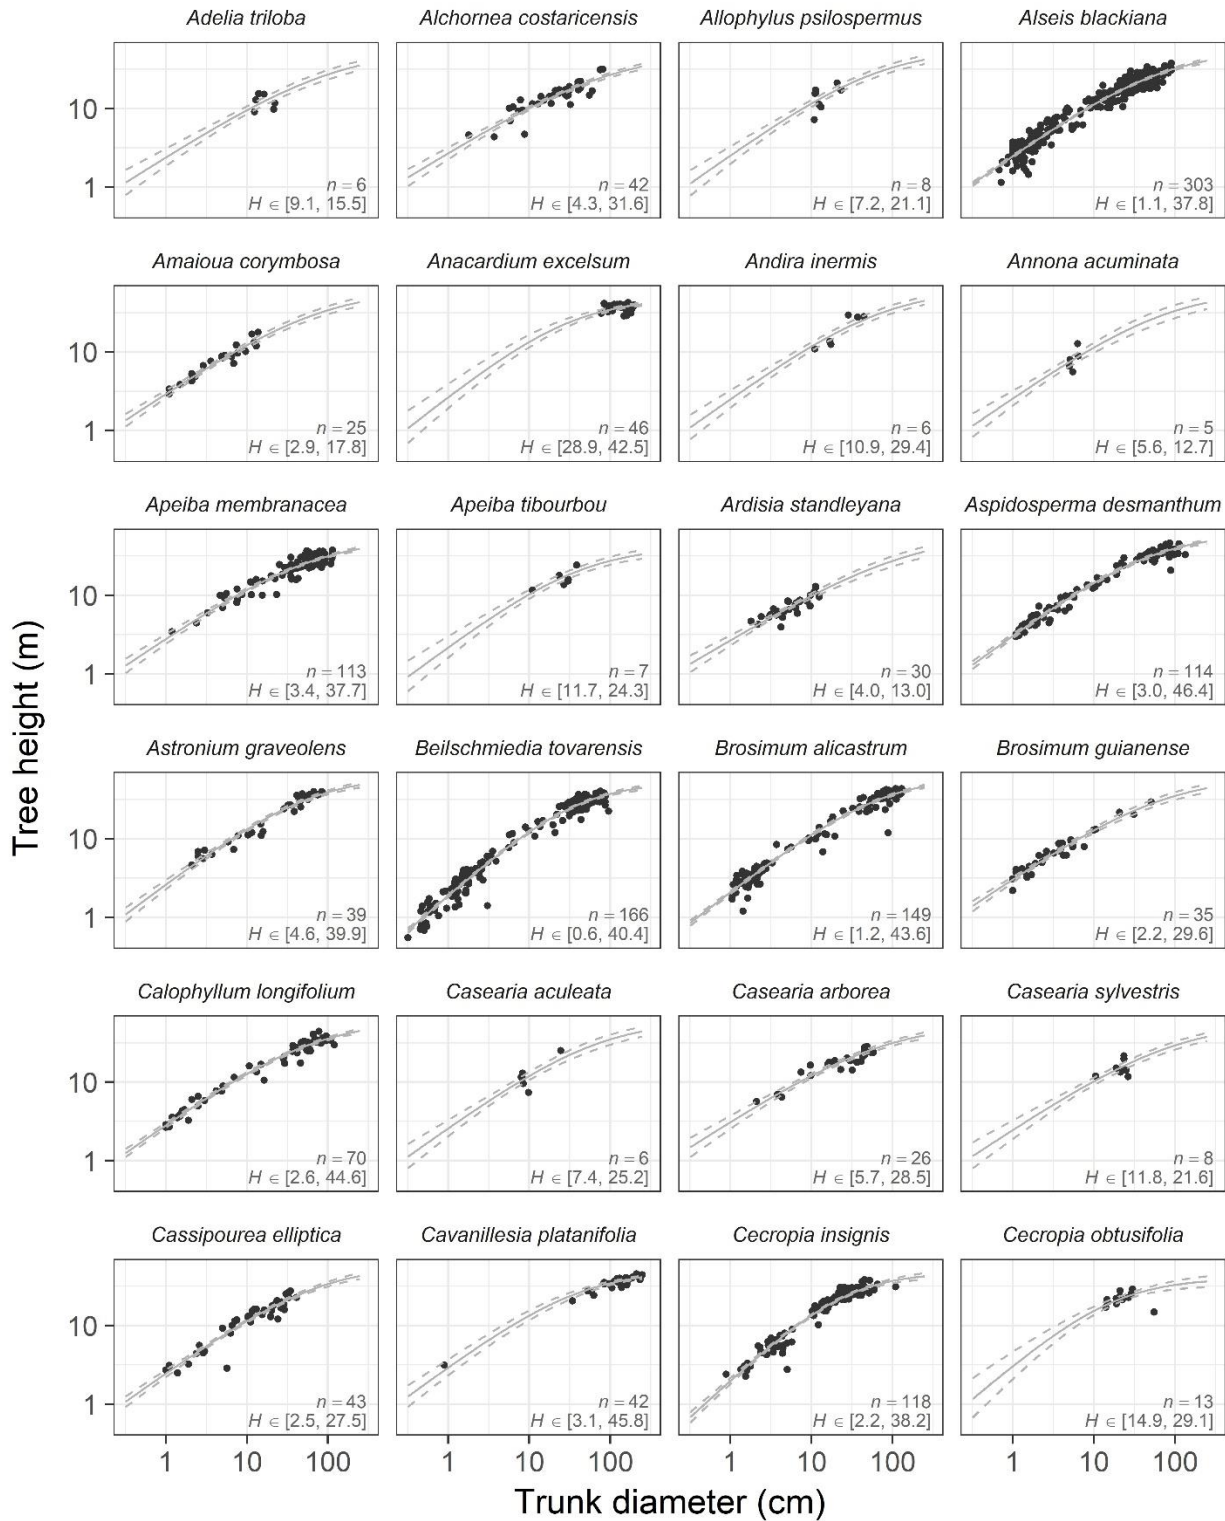

Figure S1. (continued).

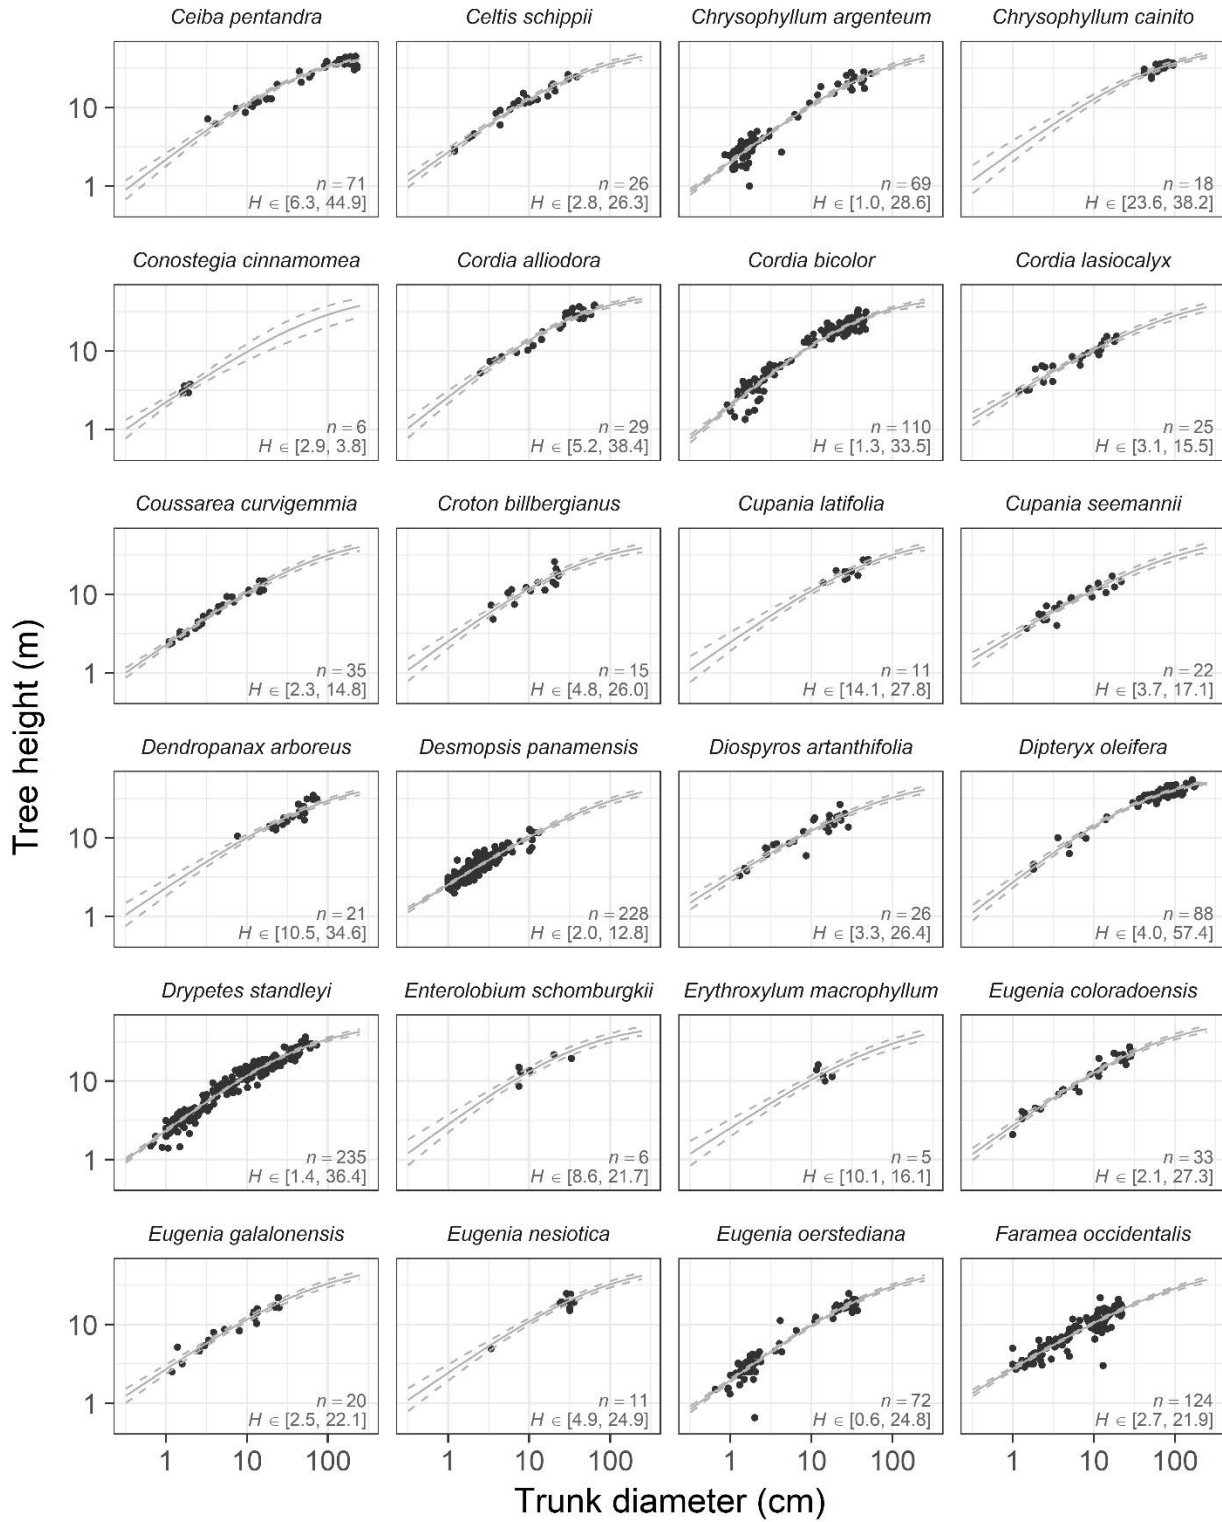

Figure S1. (continued).

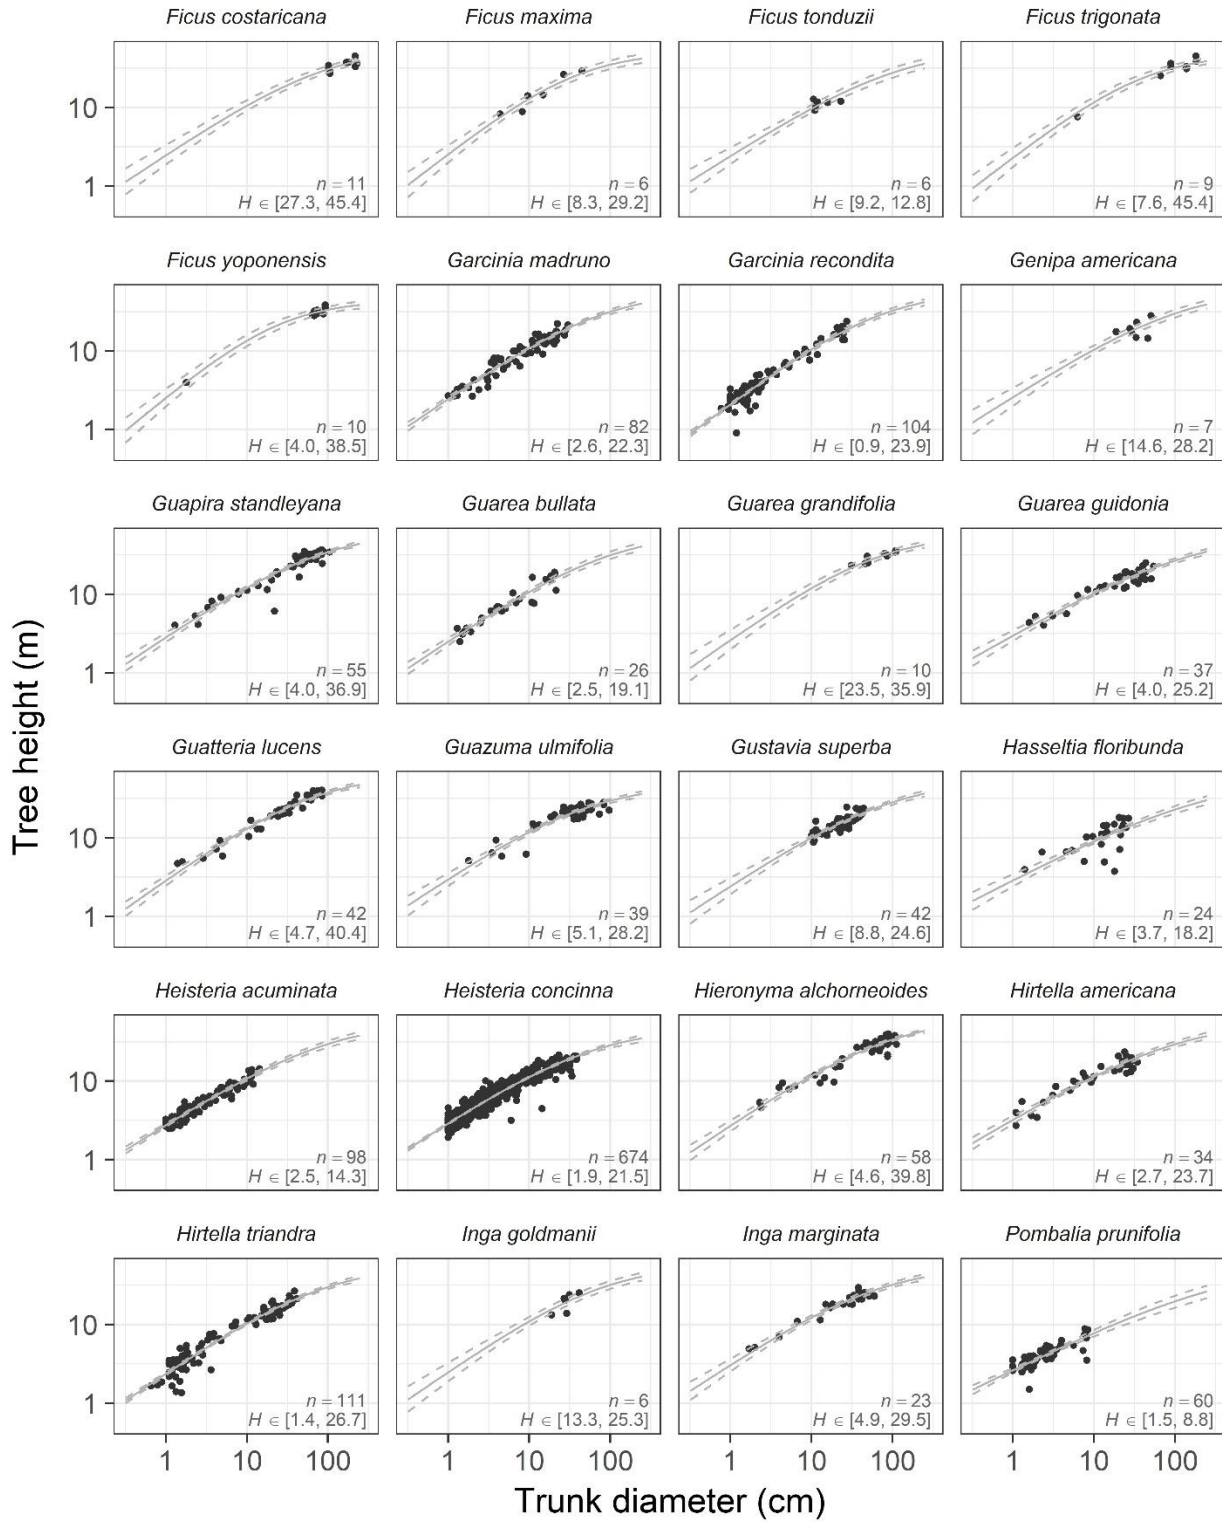

Figure S1. (continued).

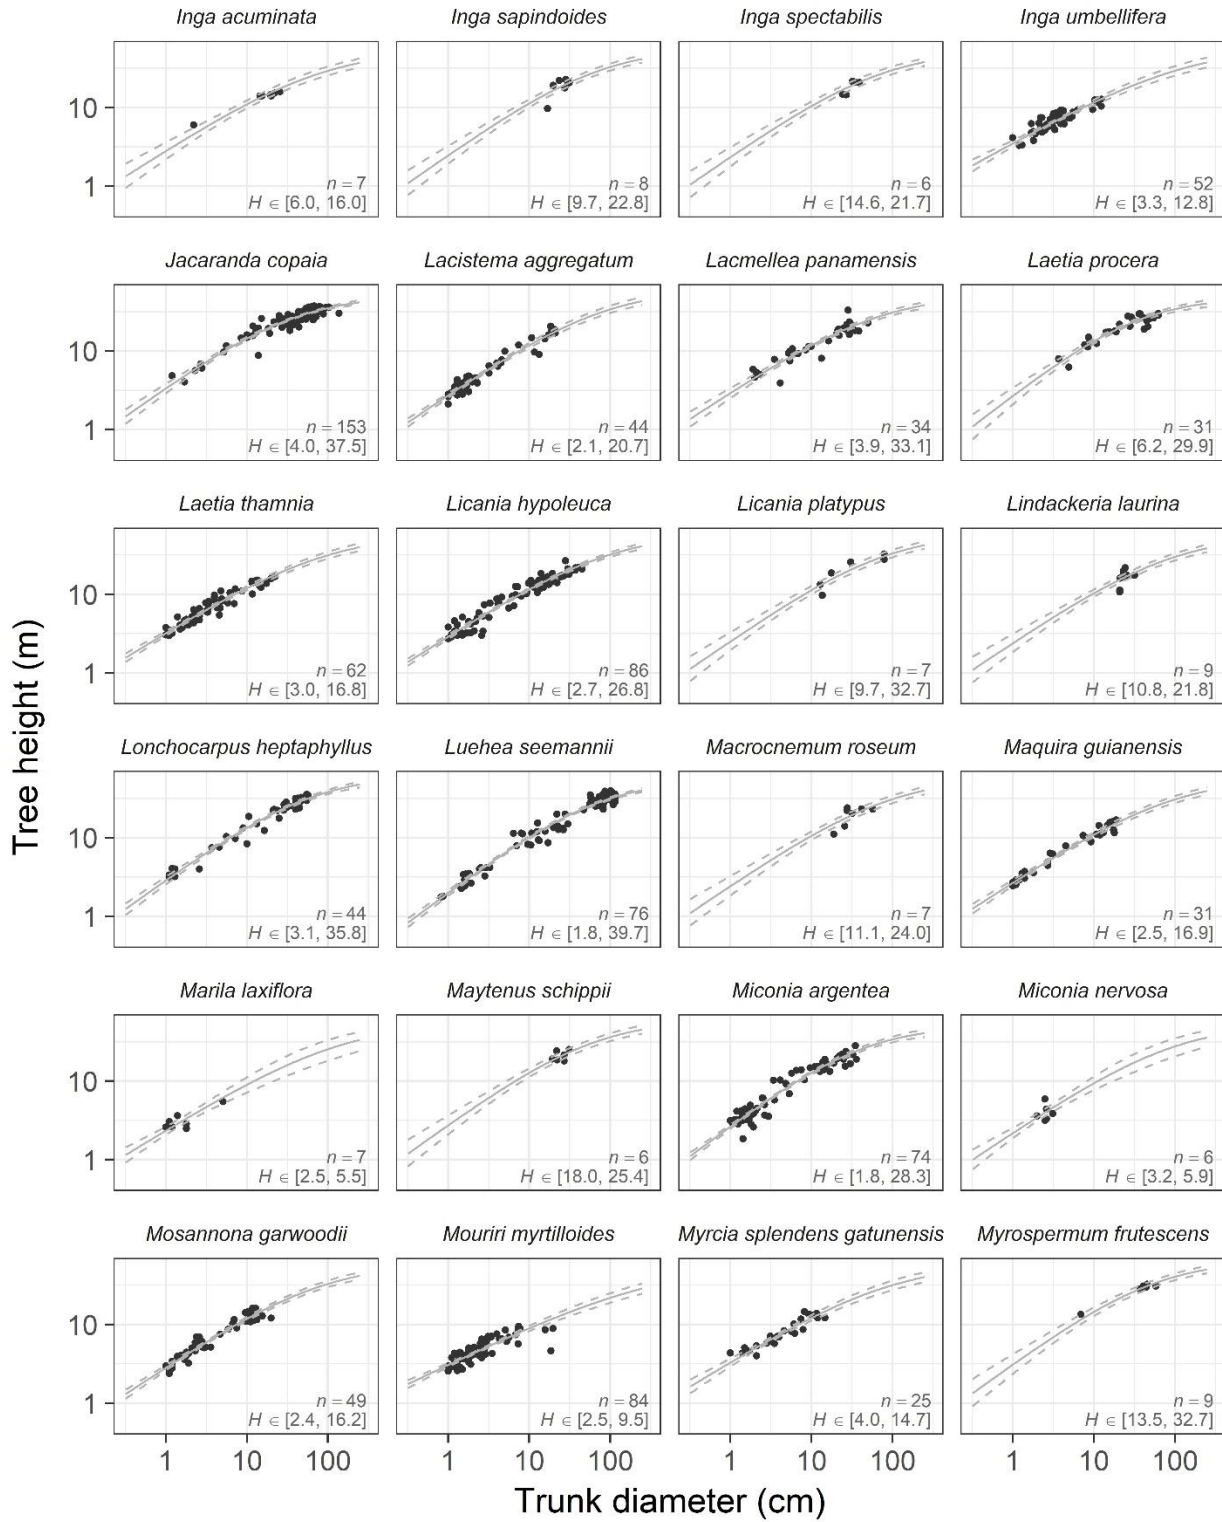

Figure S1. (continued).

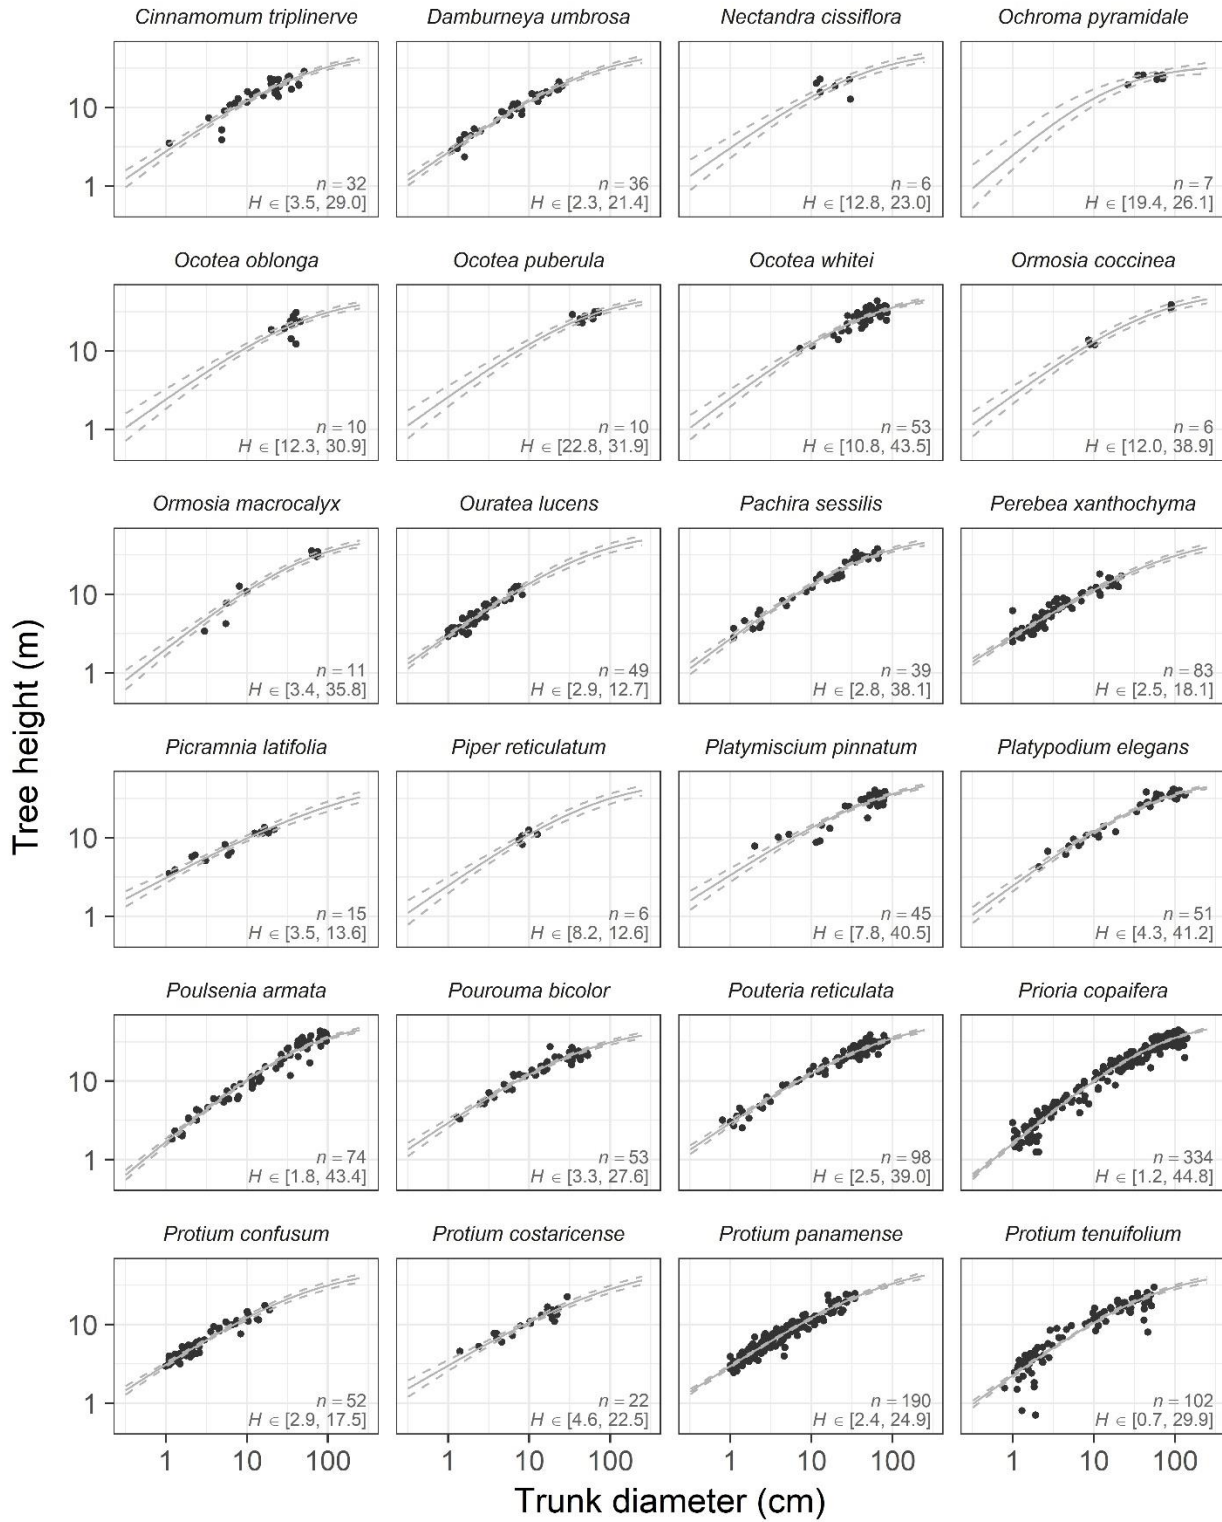

Figure S1. (continued).

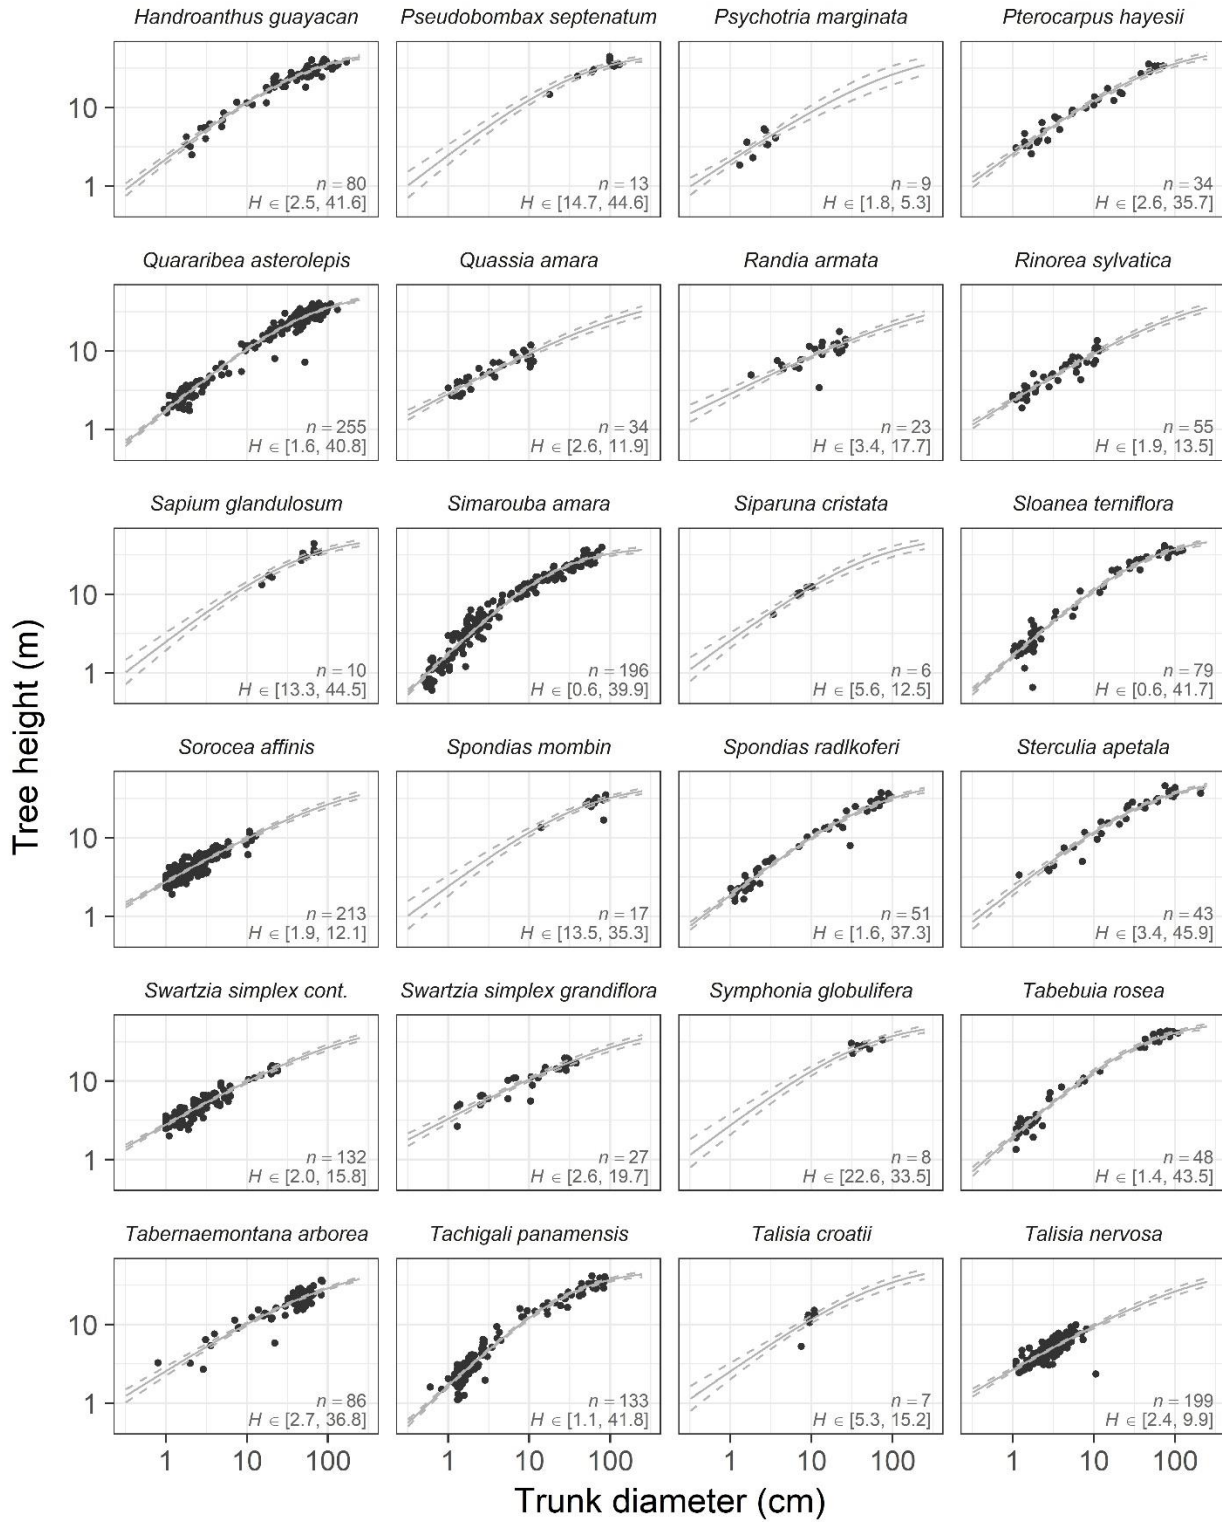

Figure S1. (continued).

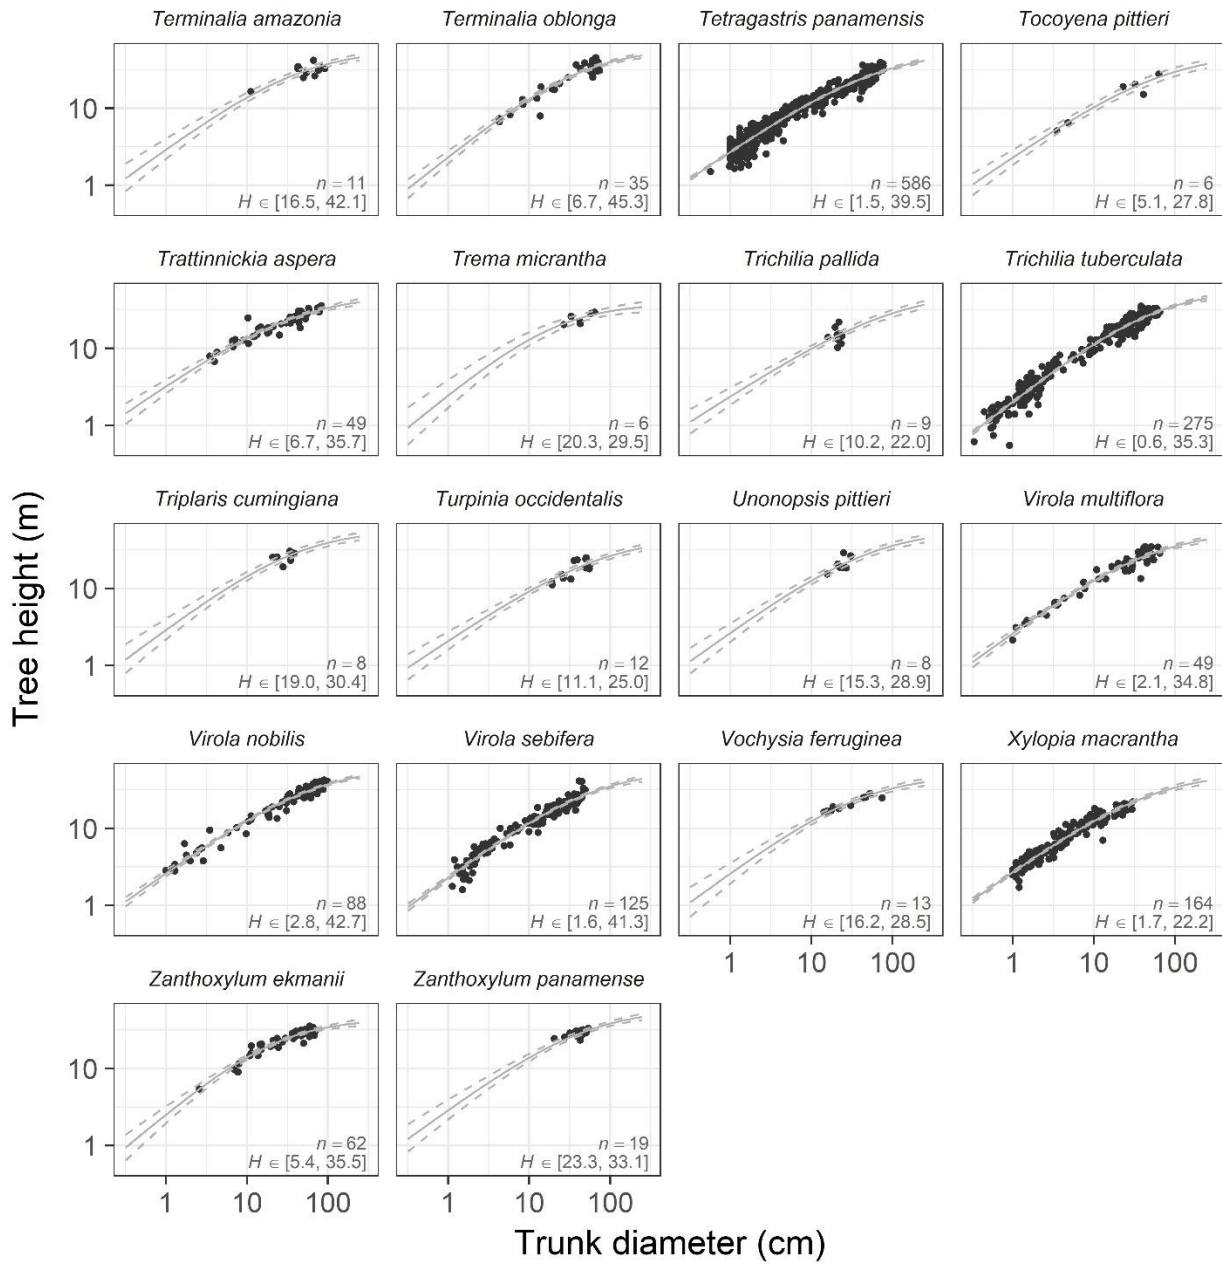



**Figure S2.** Species-specific relationships of crown area with trunk diameter, showing the data (points) and fitted relationships (solid lines) together with their 90% posterior central intervals (dashed lines). The annotations on each plot detail sample size ( $n$ ) and the observed crown area ( $C$ ) range for each species. Note the log-log axes (multiple pages).

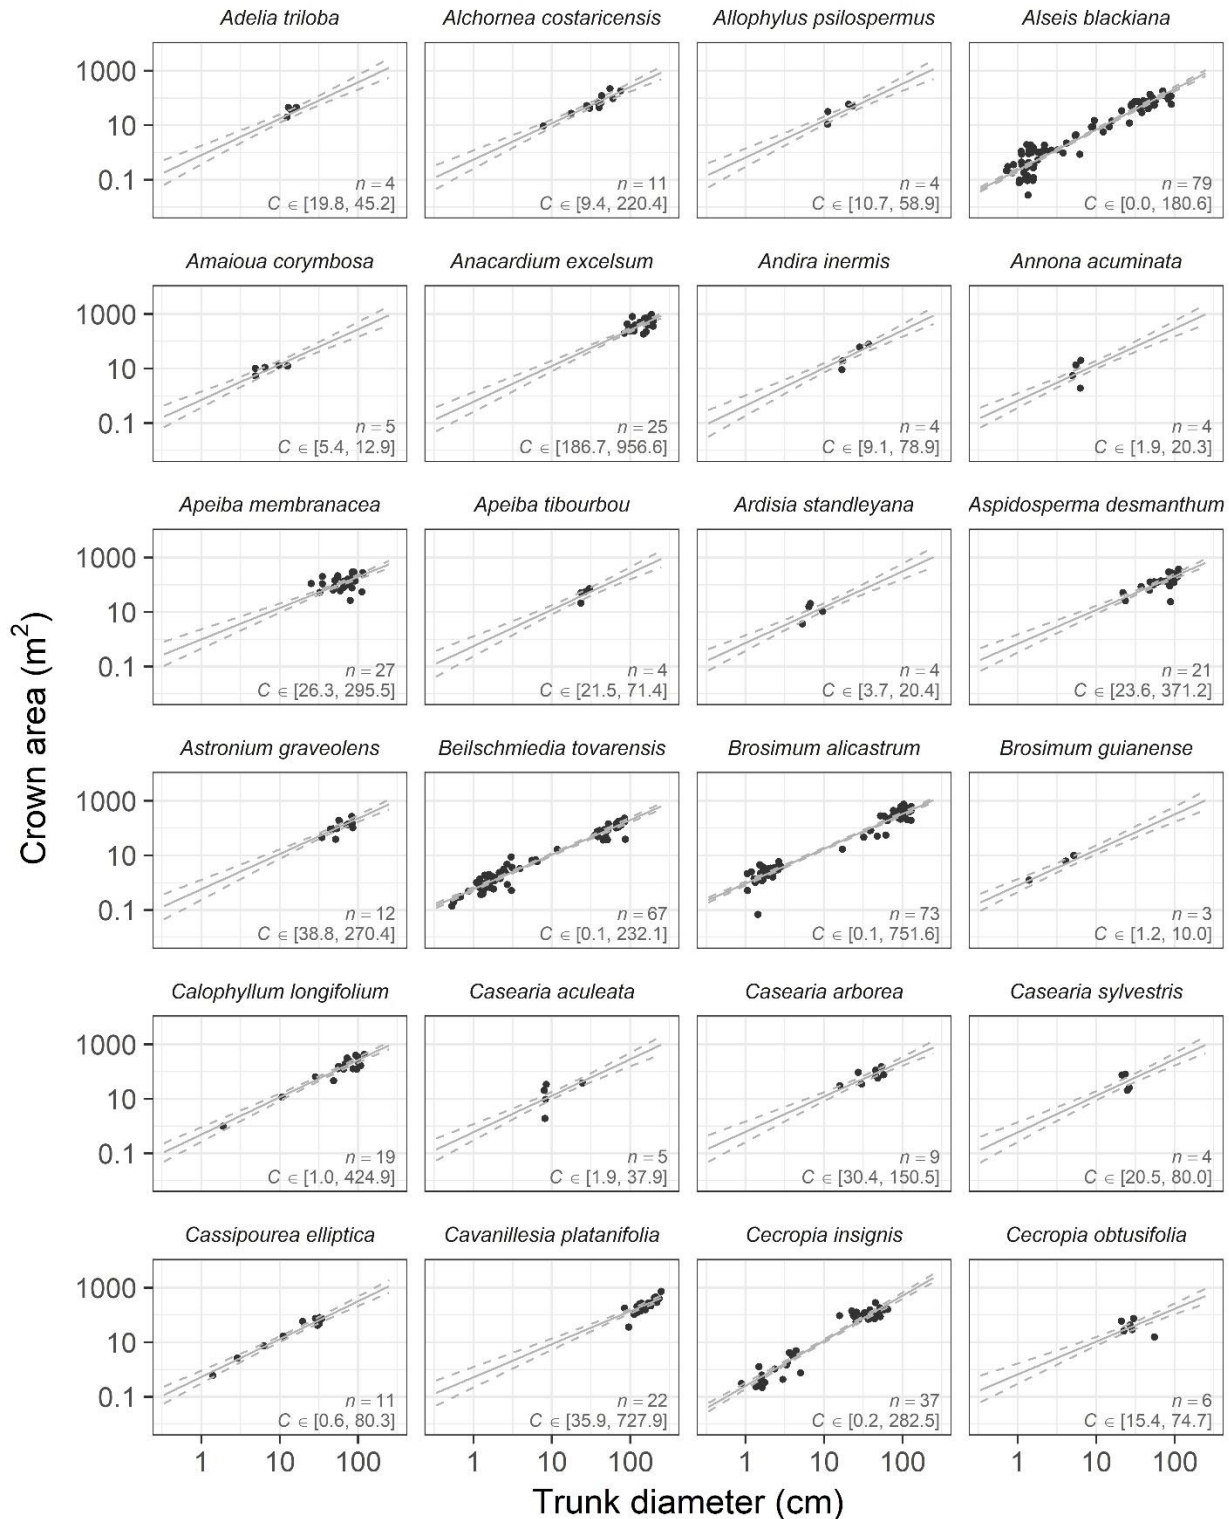

Figure S2. (continued).

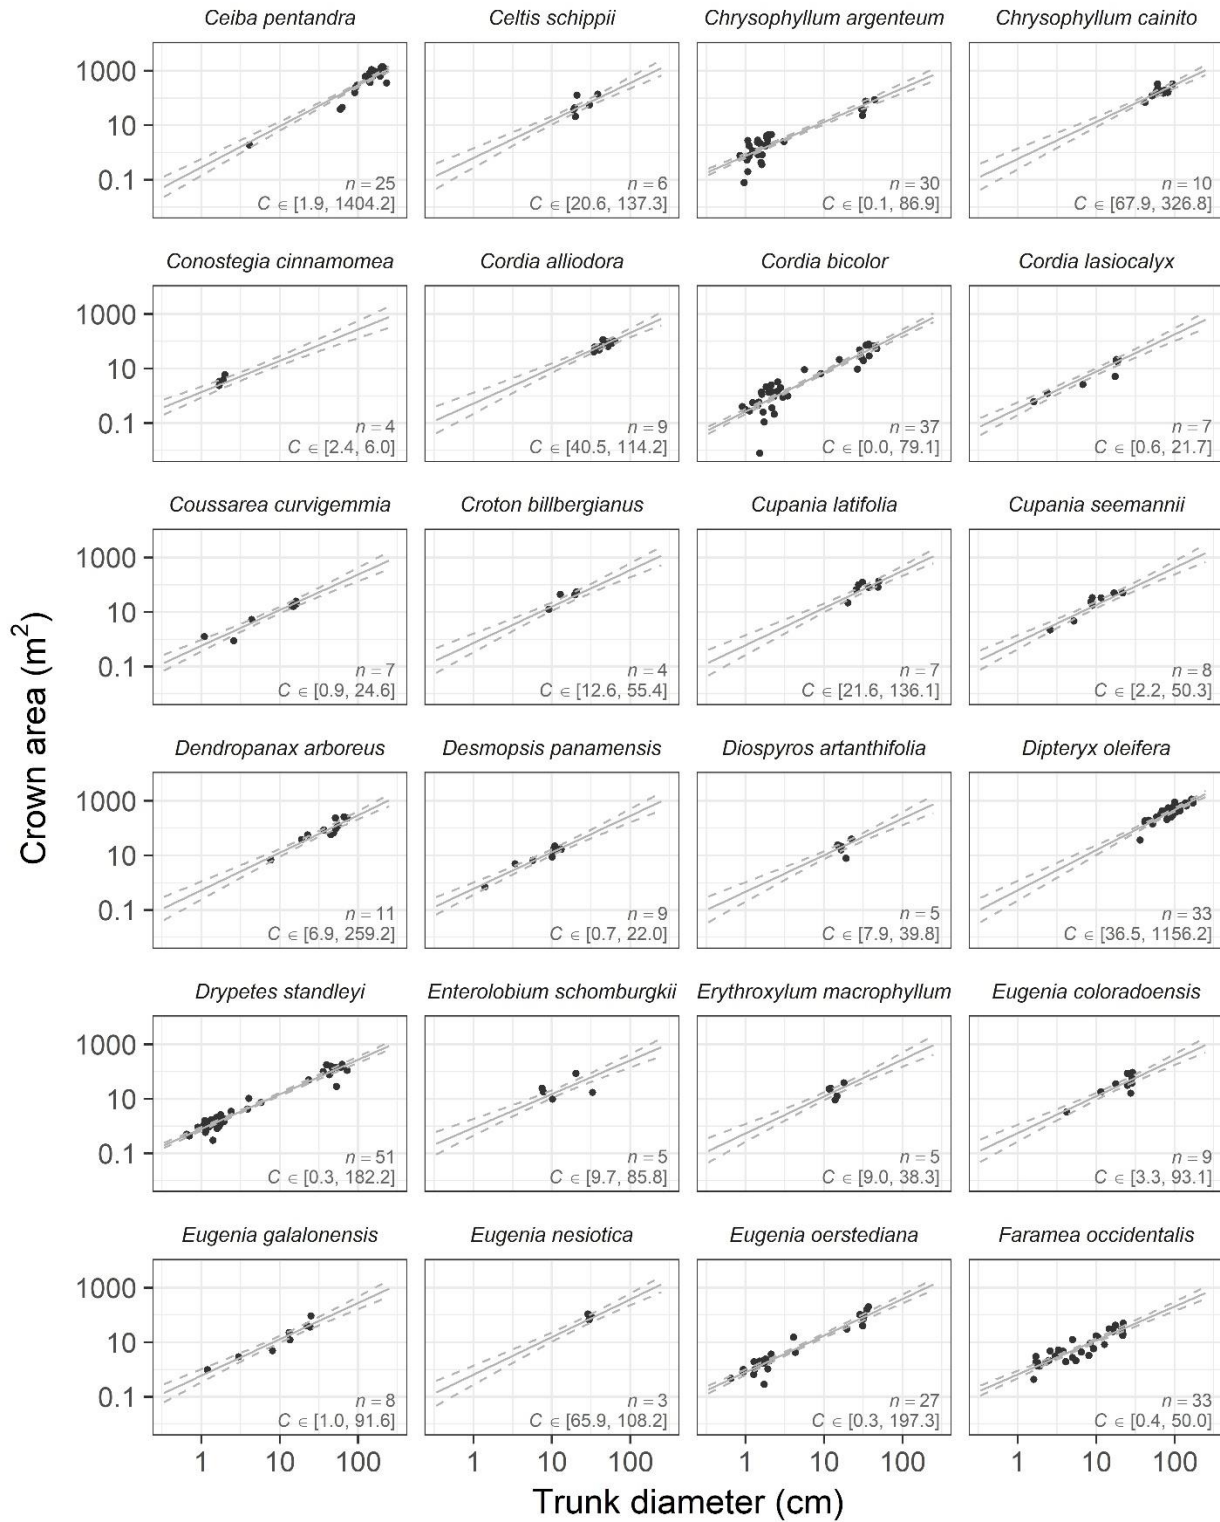

Figure S2. (continued).

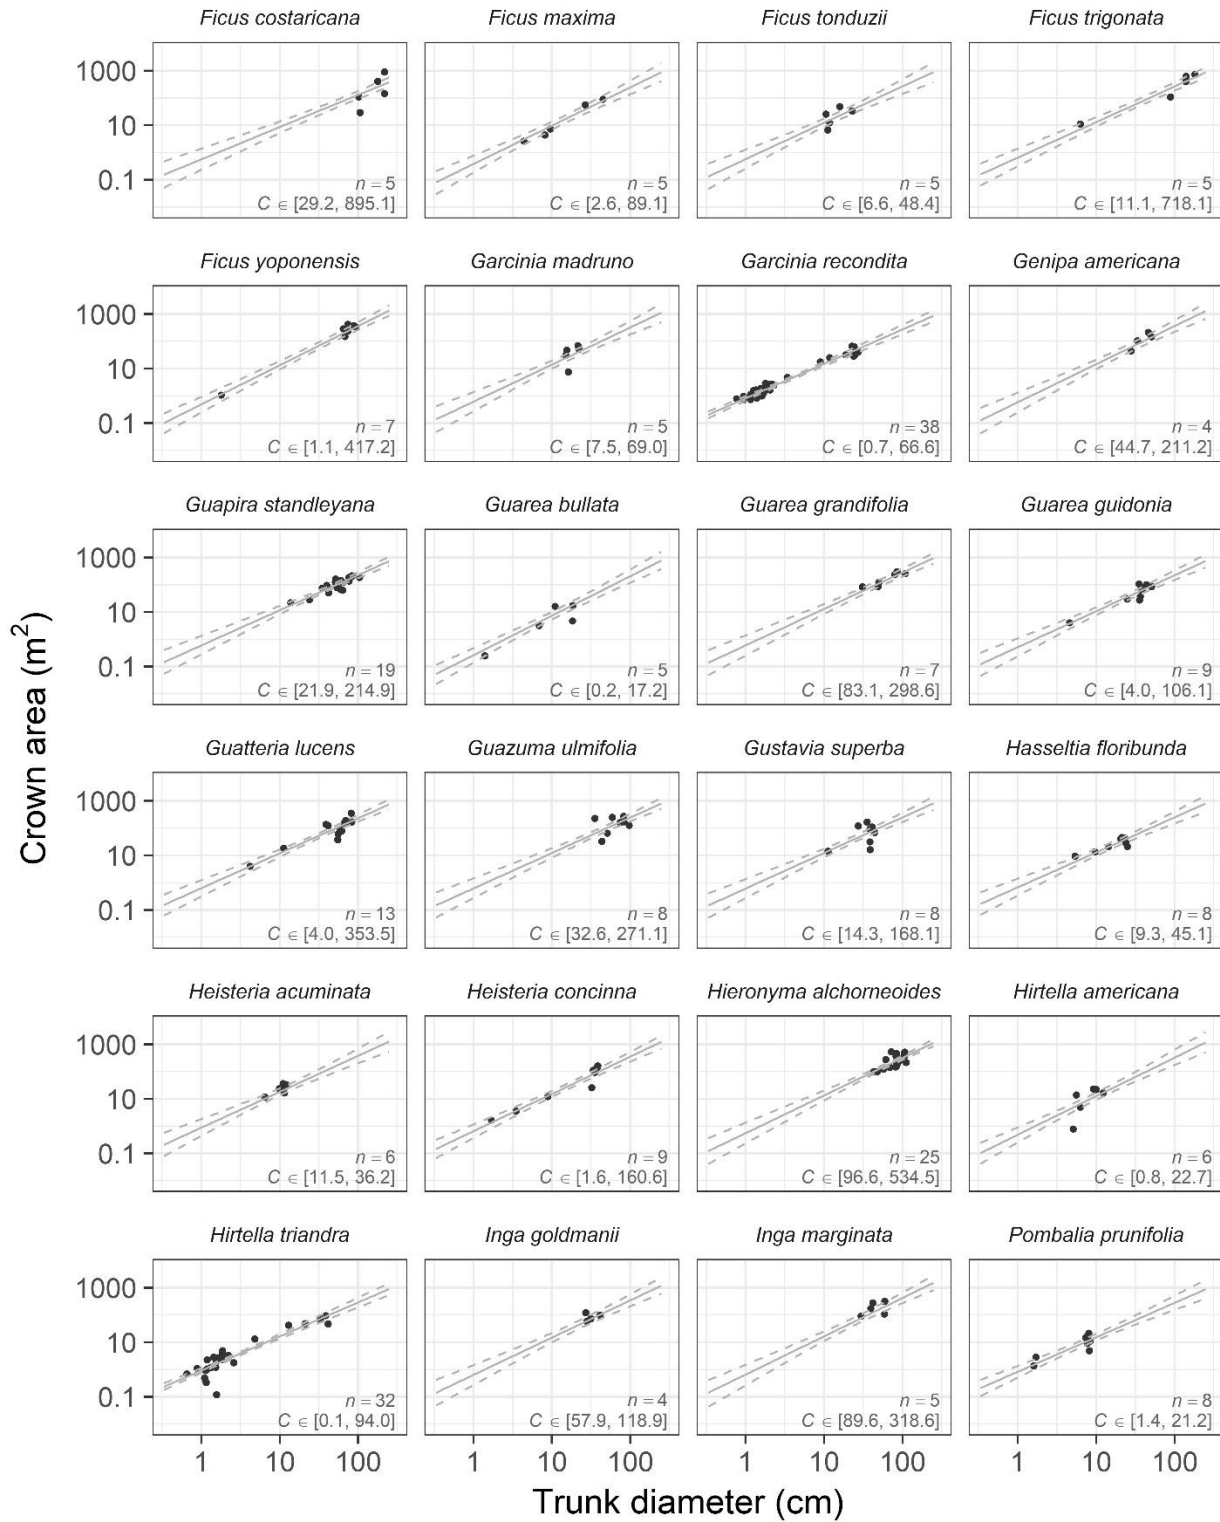

Figure S2. (continued).

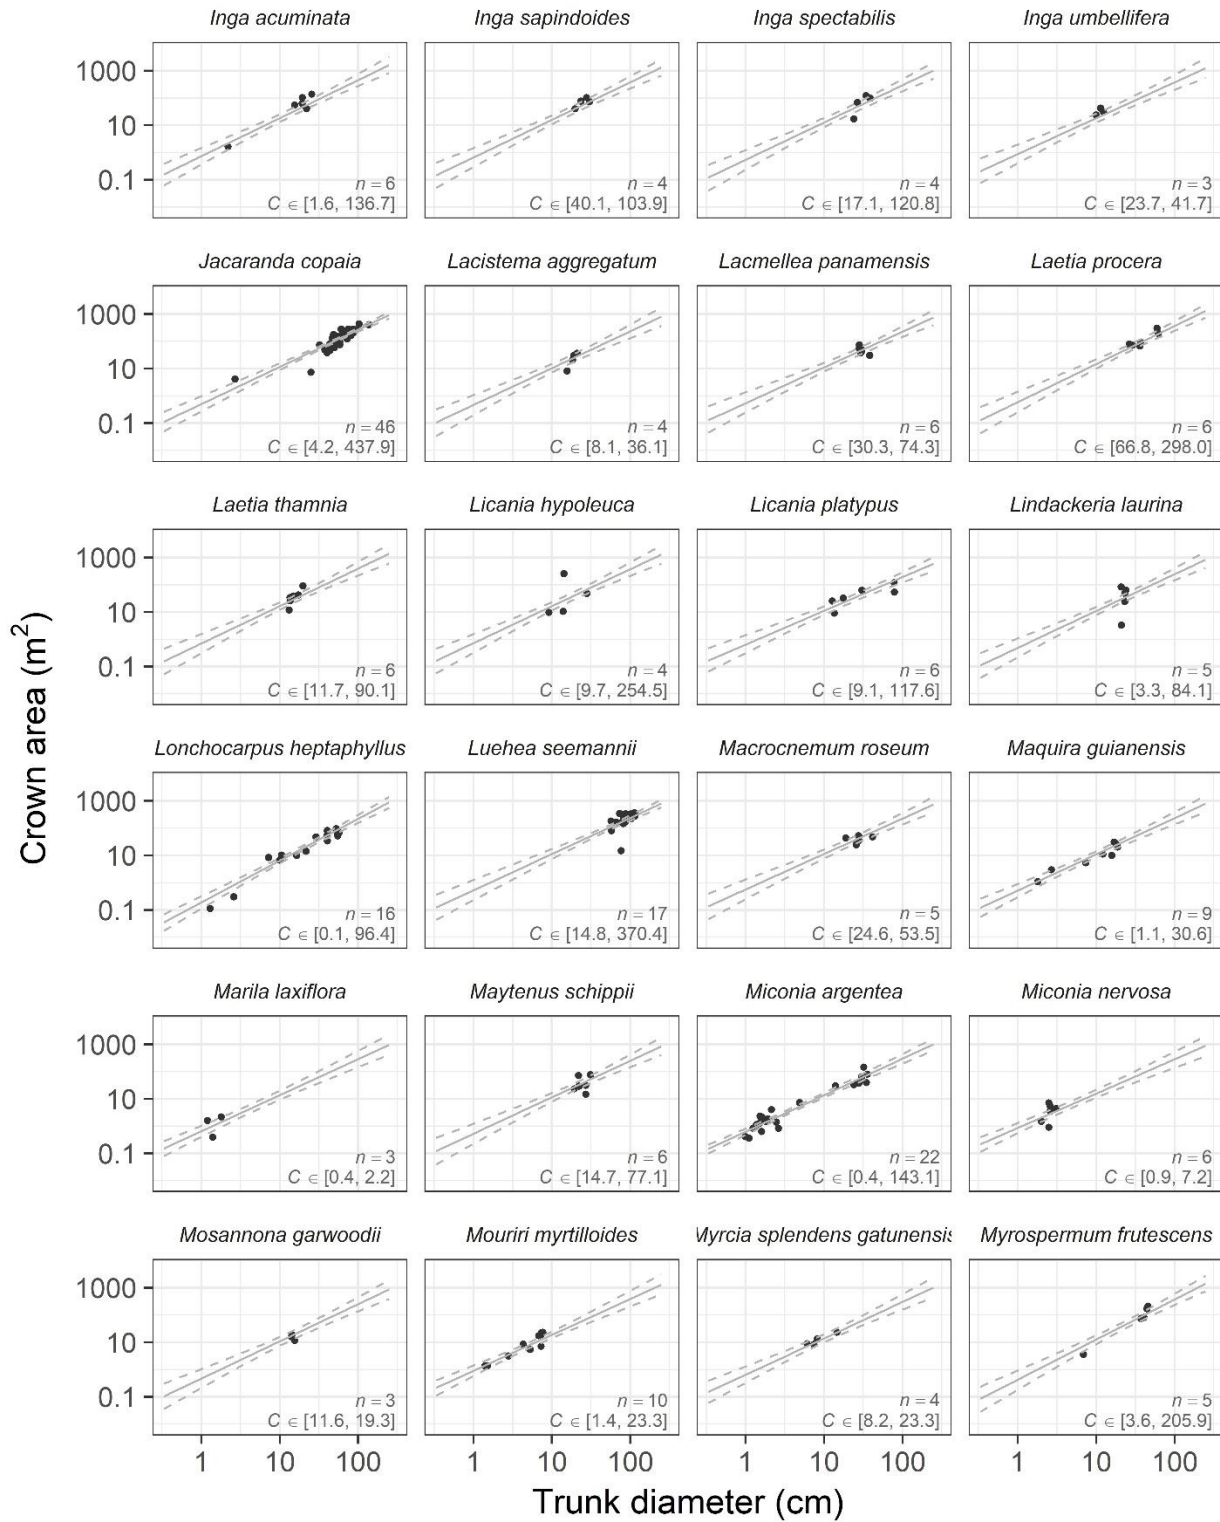

Figure S2. (continued).

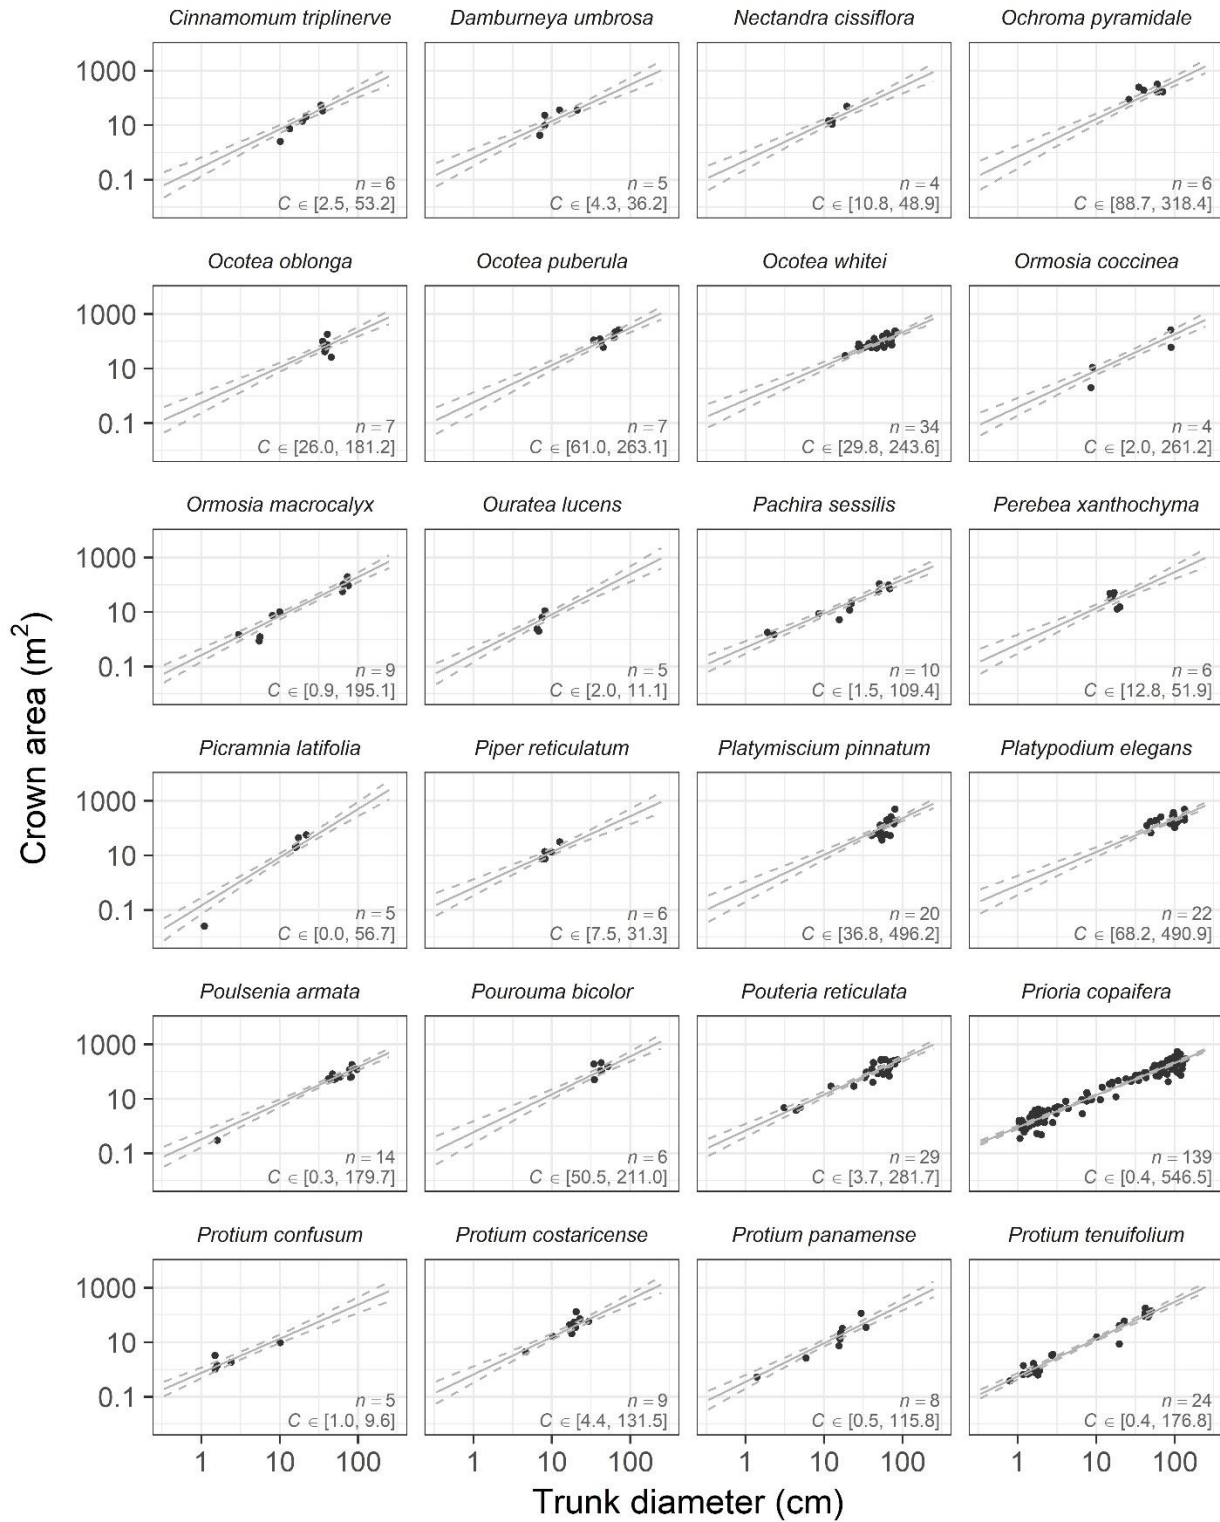

Figure S2. (continued).

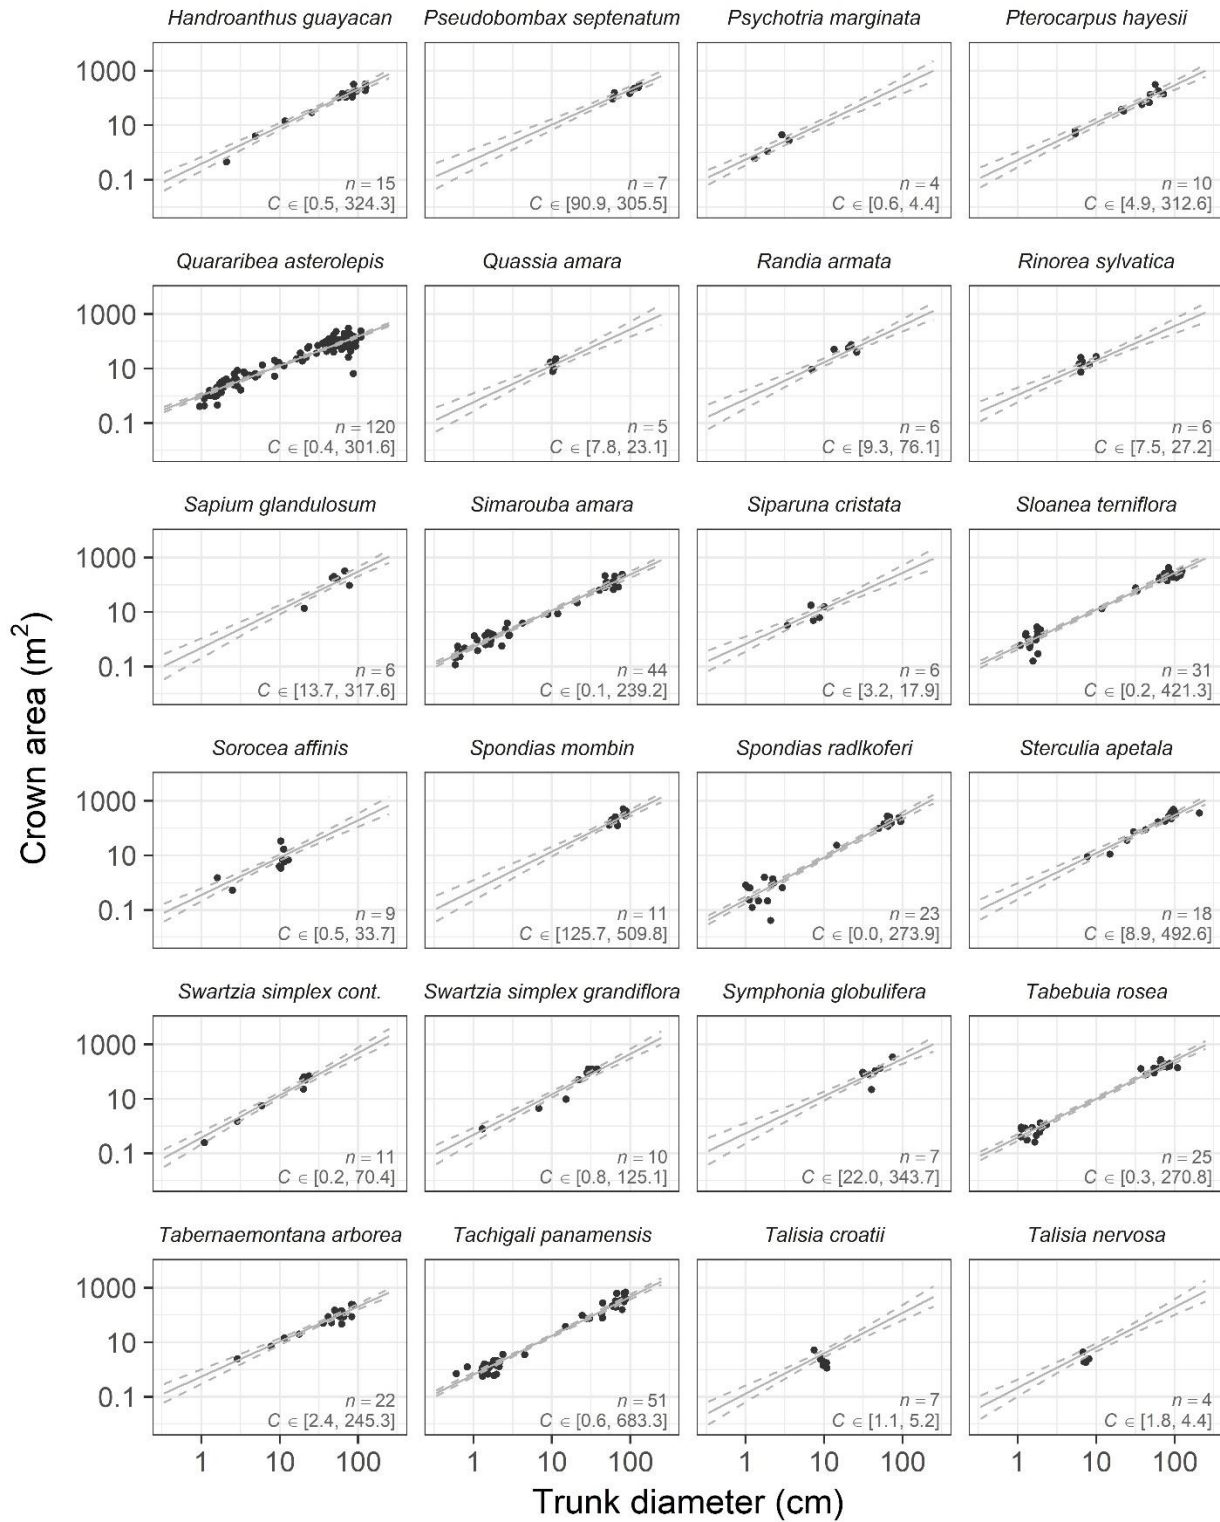

Figure S2. (continued).

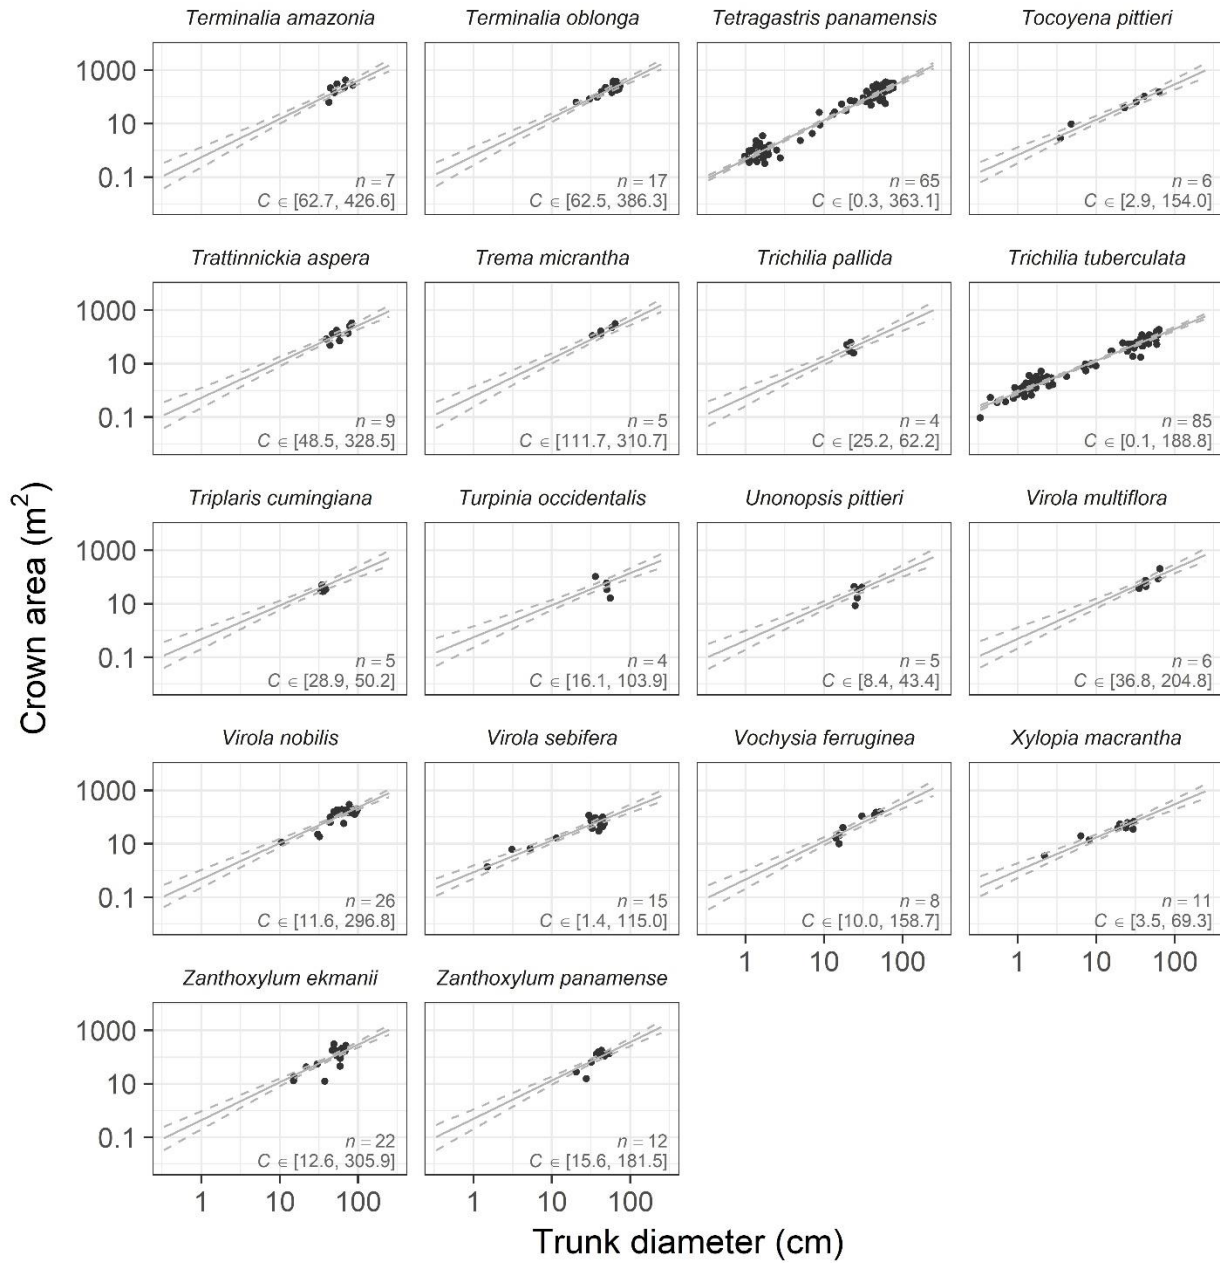





**Figure S3.** Relative error for estimates of individual tree dry aboveground biomass ( $AGB$ , Kg dry matter) based on model predictions of tree height ( $AGB_{H_{mod}}$ ) compared with estimates derived from height observations ( $AGB_{H_{obs}}$ ). This figure shows the entire range of observed DBHs (Fig. 4b in the main text highlighted differences for large trees, i.e.  $DBH > 30$  cm). Modeled tree heights were from community-level models fitted with either the power function (orange dots) or generalized Michaelis-Menten function (blue dots). All  $AGB$  estimates were based on the biomass allometry equation 6 (from Chave et al. 2014) and used the average value of wood density across species, to highlight variation related to the height allometry. The lines are LOESS smoothers that illustrate the overall departures of each model from perfect prediction (i.e.  $AGB_{H_{mod}}/AGB_{H_{obs}}$  ratio equal to unity) as a function of DBH.

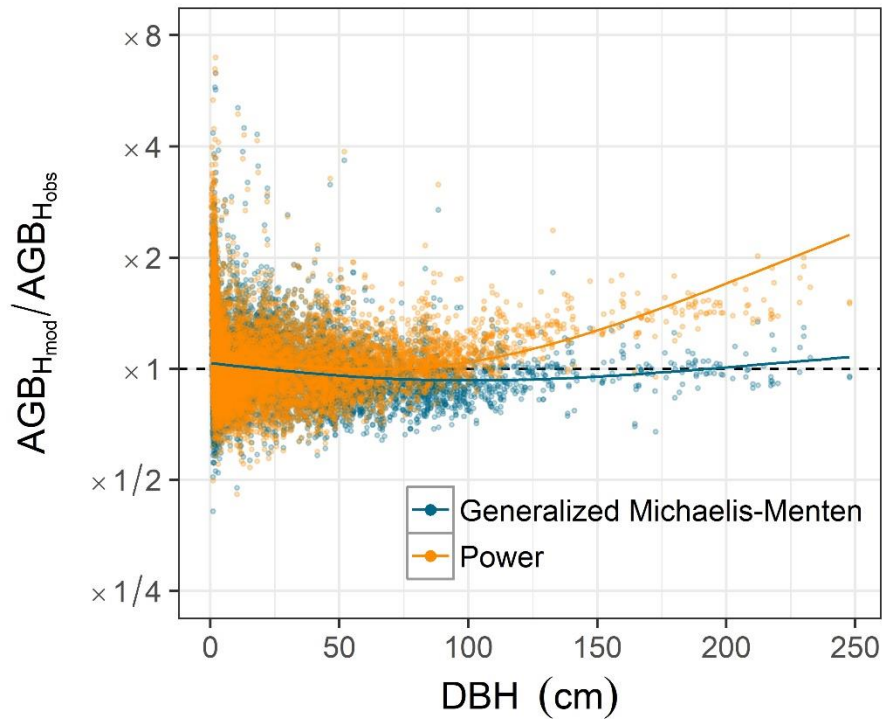

## References

- Bohlman, S., O'Brien, S.: Allometry, Adult Stature and Regeneration Requirement of 65 Tree Species on Barro Colorado Island, Panama, *J Trop Ecol*, 22, 123-136, 2006.
- Chave, J., Réjou-Méchain, M., Búrquez, A., et al.: Improved allometric models to estimate the aboveground biomass of tropical trees, *Global Change Biol*, 20, 3177-3190, doi:10.1111/gcb.12629, 2014.
- Condit, R., Aguilar, S., Pérez, R., Lao, S., Hubbell, S. P., Foster, R. B.: BCI 50-ha Plot Taxonomy as of 2017, doi.org/10.25570/stri/10088/32990, 2017.
- Dandois, J. P., Ellis, E. C.: High spatial resolution three-dimensional mapping of vegetation spectral dynamics using computer vision. *Remote Sensing of Environment*, 136, 259-276, doi.org/10.1016/j.rse.2013.04.005, 2013.
- Graves S, Gearhart J, Caughlin TT, Bohlman S.: A digital mapping method for linking high-resolution remote sensing images to individual tree crowns. *PeerJ Preprints* 6:e27182v1, doi.org/10.7287/peerj.preprints.27182v1, 2018.
- Larjavaara, M., Muller-Landau, H. C.: Measuring tree height: a quantitative comparison of two common field methods in a moist tropical forest, *Methods in Ecology and Evolution*, 4, 793-801, doi:10.1111/2041-210X.12071, 2013.
- O'Brien, S. T., Hubbell, S. P., Spiro, P., et al.: Diameter, Height, Crown, and Age Relationship in Eight Neotropical Tree Species, *Ecology*, 76, 1926-1939, doi:10.2307/1940724, 1995.
- Sprugel, D. G.: Correcting for Bias in Log-Transformed Allometric Equations, *Ecology*, 64, 209-210, doi:10.2307/1937343, 1983.
- Wright, S. J., Kitajima, K., Kraft, N. J. B., et al.: Functional traits and the growth–mortality trade-off in tropical trees, *Ecology*, 91, 3664-3674, doi:10.1890/09-2335.1, 2010.

## Section S2: Stan code

### Power function model

```
// Linear mixed model with varying parameters among species and one species level covariate
// for a power function allometric model
data {
  // inputs
  int<lower=0> N; // number of individuals
  int<lower=0> Ng; // number of species
  int<lower=0> p; // number of parameters per species  vector[N] y; // dependent variable: natural
  // Logarithm of tree height or crown area
  vector[N] x; // independent variable: natural logarithm of trunk diameter
  int g[N]; // species indicator
  real xbar; // mean of x  vector[Ng] z; // trait covariate, one value per species
  real zbar; real zs; // mean and standard deviation of the covariate z across species
}
transformed data{
  vector[Ng] zc; // centered and scaled covariate
  for ( i in 1:Ng )
  {
    zc[i] = ( z[i] - zbar ) / zs;
  }
}
parameters {
  vector[p] theta[Ng]; // species parameters of the allometric model: here a and b (Eq. 1 in the main
  // text)
  vector[p] alpha; // community level means (means of parameters across species) (Eq. 5 of the main text)
  vector[p] beta; // community level effects of the covariate 'z' on each parameter (Eq. 5 of the main
  // text)
  real<lower=0> sigmaa; // standard deviation of parameter a across species,
  real<lower=0> sigmab; // standard deviation of parameter b across species
  real<lower=0> serror; // standard deviation for observation error (sigmav in Eq. 1 of main text)
}
transformed parameters {
  vector[N] y_hat; // predicted mean for each y  for ( n in 1:N )
  {
    // power function
    y_hat[n] = theta[g[n], 1] + theta[g[n], 2] * ( x[n] - xbar );
  }
}
model {
  // prior distributions for the community level means
  alpha[1] ~ normal( 0, 100 ); alpha[2] ~ normal( 0, 100 );
  // prior distributions for community level covariate effects
  beta[1] ~ normal( 0, 100 ); beta[2] ~ normal( 0, 100 );
  // community level parameters act as priors of species level parameters
  for ( i in 1:Ng )
  {
    theta[i, 1] ~ normal( alpha[1] + beta[1] * zc[i], sigmaa ); // prior for species level parameter log a
    theta[i, 2] ~ normal( alpha[2] + beta[2] * zc[i], sigmab ); // prior for species level parameter b
  }
  // data model
  y ~ normal( y_hat, serror );
  // weakly informative priors for scale parameters
  sigmaa ~ cauchy( 0.0, 2.5 ); sigmab ~ cauchy( 0.0, 2.5 );
  serror ~ cauchy( 0.0, 2.5 );
}
generated quantities {
  // pointwise log-likelihoods for WAIC estimation
  vector[N] log_lik;
  for ( n in 1:N )
  {
    log_lik[n] = normal_lpdf( y[n] | y_hat[n], serror );
  }
}
```

## Generalized Michaelis-Menten model

```
// Nonlinear mixed model with varying parameters among species and one species level covariate
// for a generalized Michaelis Menten allometric model
data {
  int<lower=0> N; // number of individuals
  int<lower=0> Ng; // number of species
  int<lower=0> p; // number of parameters per species
  vector[N] y; // dependent variable: natural logarithm of tree height or crown area
  vector[N] x; // independent variable: natural logarithm of trunk diameter
  int g[N]; // species indicator
  real xbar; // mean of x
  vector[Ng] z; // trait covariate, one value per species
  real zbar; real zs; // mean and standard deviation of the covariate z across species
}
transformed data{
  vector[Ng] zc; // centered and scaled covariate
  for ( i in 1 : Ng )
  {
    zc[i] = ( z[i] - zbar ) / zs;
  }
}
parameters {
  vector[p] theta[Ng]; // species parameters of the allometric model: here a, b and k (Eq. 1 in the main
text)
  vector[p] alpha; // community level means (means of parameters across species) (Eq. 5 of the main text)
  vector[p] beta; // community level effects of the covariate 'z' on each parameter (Eq. 5 of the main
text)
  real< lower=0 > sigmaa; // standard deviation of parameter a across species,
  real< lower=0 > sigmab; // standard deviation of parameter b across species,
  real< lower=0 > sigmak; // standard deviation of parameter k across species
  real< lower=0 > serror; // standard deviation for observation error (sigmav in Eq. 1 of main text)
}
transformed parameters {
  vector[N] y_hat; // predicted mean for each y
  for ( n in 1 : N )
  {
    // generalized Michaelis Menten
    y_hat[n] = theta[g[n], 1] + theta[g[n], 2] * log( x[n] ) - log(theta[g[n], 3] + pow( x[n], theta[g[n],
2] ) ));
  }
}
model {
  // prior distributions for the community level means
  alpha[1] ~ normal( 0, 100 ); alpha[2] ~ normal( 0, 100 )T[0,]; alpha[3] ~ normal( 0, 100 )T[0,];
  // prior distribution for community level covariate effects
  beta[1] ~ normal( 0, 100 ); beta[2] ~ normal( 0, 100 ); beta[3] ~ normal( 0, 100 );
  // community level parameters act as priors of species level parameters
  for ( i in 1 : Ng )
  {
    theta[i, 1] ~ normal( mu[1] + theta[1] * zc[i], sigmaa ); // prior for species level parameter Log a
    theta[i, 2] ~ normal( mu[2] + theta[2] * zc[i], sigmab )T[0,]; // prior for species level parameter b
    theta[i, 3] ~ normal( mu[3] + theta[3] * zc[i], sigmak )T[0,]; // prior for species level parameter k
  }
  // data model
  y ~ normal( y_hat, serror );
  // weakly informative priors for scale parameters
  sigmaa ~ cauchy( 0.0, 2.5 ); sigmab ~ cauchy( 0.0, 2.5 ); sigmak ~ cauchy( 0.0, 2.5 );
  serror ~ cauchy( 0.0, 2.5 );
}
generated quantities {
  // pointwise log-likelihoods for WAIC estimation
  vector[N] log_lik;
  for ( n in 1 : N )
  {
    log_lik[n] = normal_lpdf( y[n] | y_hat[n], serror );
  }
}
```

## Rescaled Weibull model

```
// Nonlinear mixed model with varying parameters among species and one species level covariate
// for a rescaled Weibull allometric model
data {
  int<lower=0> N; // number of individuals
  int<lower=0> Ng; // number of species
  int<lower=0> p; // number of parameters per species  vector[N] y; // dependent variable: natural
  // Logarithm of tree height or crown area
  vector[N] x; // independent variable: natural logarithm of trunk diameter
  int g[N]; // species indicator
  real xbar; // mean of x  vector[Ng] z; // trait covariate, one value per species
  real zbar; real zs; // mean and standard deviation of the covariate z across species
}
transformed data{
  vector[Ng] zc; // centered and scaled covariate
  for ( i in 1 : Ng )
  {
    zc[i] = ( z[i] - zbar ) / zs;
  }
}
parameters {
  vector[p] theta[Ng]; // species parameters of the allometric model: here a, b and k (Eq. 1 in the main
  // text)
  vector<lower=0>[p] alpha; // community level means (means of parameters across species) (Eq. 5 of the
  // main text)
  vector[p] beta; // community level effects of the covariate 'z' on each parameter (Eq. 5 of the main
  // text)
  real<lower=0> sigmaa; // standard deviation of parameter a across species,
  real<lower=0> sigmab; // standard deviation of parameter b across species,
  real<lower=0> sigmak; // standard deviation of parameter k across species
  real<lower=0> serror; // standard deviation for observation error (sigmav in Eq. 1 of main text)
}
transformed parameters {
  vector[N] y_hat; // predicted mean for each y  for ( n in 1 : N )
  {
    // Rescaled Weibull [version with improved numerical stability]
    // http://mc-stan.org/misc/warnings.html#exception-hamiltonian-proposal-rejected
    y_hat[n] = log( theta[g[n], 1] ) + log1m_exp( - theta[g[n], 2] * pow( x[n], theta[g[n], 3] ) );
  }
}
model {
  // prior distribution for the parameters of the regression predicting population level parameters
  alpha[1] ~ normal( 0, 100 )T[0,]; alpha[2] ~ normal( 0, 100 )T[0,]; alpha[3] ~ normal( 0, 100 )T[0,];
  // prior distribution for community level covariate effects
  beta[1] ~ normal( 0, 100 ); beta[2] ~ normal( 0, 100 ); beta[3] ~ normal( 0, 100 );
  // community level parameters act as priors of species level parameters
  for ( i in 1 : Ng )
  {
    theta[i, 1] ~ normal( mu[1] + theta[1] * zc[i], sigmaa )T[0,]; // prior for species level parameter a
    theta[i, 2] ~ normal( mu[2] + theta[2] * zc[i], sigmab )T[0,]; // prior for species level parameter b
    theta[i, 3] ~ normal( mu[3] + theta[3] * zc[i], sigmak )T[0,]; // prior for species level parameter k
  }

  // data model
  y ~ normal( y_hat, serror );

  // weakly informative priors for scale parameters
  sigmaa ~ cauchy( 0.0, 2.5 );  sigmab ~ cauchy( 0.0, 2.5 );  sigmak ~ cauchy( 0.0, 2.5 );
  serror ~ cauchy( 0.0, 2.5 );
}
generated quantities {
  // pointwise log-likelihoods for WAIC estimation
  vector[N] log_lik;
  for ( n in 1 : N )
  {
    log_lik[n] = normal_lpdf( y[n] | y_hat[n], serror );
  }
}
```
